# Supplementary material for: Revisiting the synthesis of aryl nitriles: a pivotal role of CAN
Source: Royal Society of Chemistry journal article supplement (doi:10.1039/d0ob02518f), 2021-01-01

# SUPPORTING INFORMATION

## FOR

### Revisiting the Synthesis of Aryl Nitriles: A pivotal role of CAN

Rakhee Saikia,<sup>a</sup> Kwihwan Park,<sup>b</sup> Hayato Masuda,<sup>b</sup> Miki Itoh,<sup>b</sup> Tsuyoshi Yamada,<sup>b</sup> Hironao Sajiki,<sup>b</sup>  
Sanjeev P Mahanta, Ashim J Thakur,<sup>a</sup> Utpal Bora<sup>a\*</sup>

<sup>a</sup>*Department of Chemical Sciences, Tezpur University, Napaam, Tezpur, Assam, Pin-784028*

<sup>b</sup>*Laboratory of Organic Chemistry, Gifu Pharmaceutical University, 1-25-4 Daigaku-nishi, Gifu 501-1196, Japan*

*E-mail: utbora@yahoo.co.in, ubora@tezu.ernet.in*

#### CONTENTS

| <i>S. No.</i> |                                                                                          | <i>Page No.</i> |
|---------------|------------------------------------------------------------------------------------------|-----------------|
| 1             | XPS analysis of the reaction mixture                                                     | S2              |
| 2             | Picrate paper test                                                                       | S2              |
| 3             | Experimental procedures for controlled reactions                                         | S2-S4           |
| 4             | Copies of <sup>1</sup> H and <sup>13</sup> C NMR spectra of the aryl nitrile derivatives | S5-S29          |

## 1. XPS ANALYSIS OF THE REACTION MIXTURE

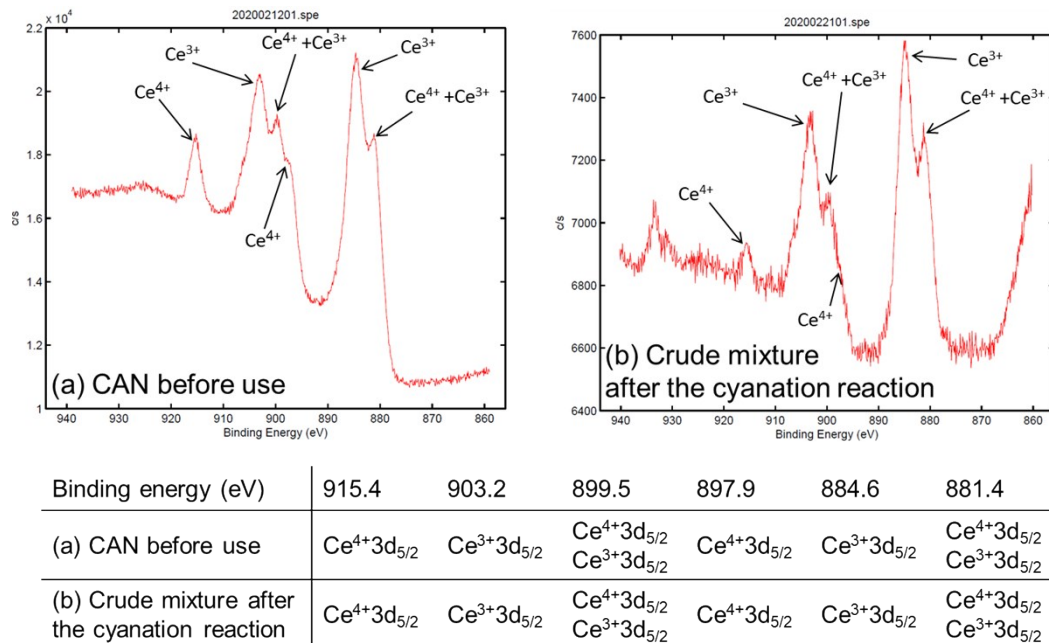

**Figure 1** XPS spectra of (a) CAN before use and (b) crude mixture after cyanation reaction.

## 2. PICRATE PAPER TEST

Picrate paper is prepared by dipping a filter paper in a 0.5% w/v solution of moist picric acid in 2.5% w/v NaHCO<sub>3</sub>, allowing the paper to dry in air and then cutting to the required strip size.

A picrate paper strip was inserted into the reaction flask under reflux conditions in a pre-heated oil bath at 130 °C, containing CAN, Cu(OTf)<sub>2</sub>, K<sub>2</sub>CO<sub>3</sub> and DMF. The colour of the picrate paper strip changed from yellow to red. This indicates the generation of CN<sup>-</sup> in the reaction medium.

## 3. EXPERIMENTAL PROCEDURE FOR CONTROLLED REACTIONS

All the reactions were carried out in a 50 ml round-bottomed flask with a magnetic stirring bead fitted to a condenser (filled with water) and stirred at 130 °C in a pre-heated oil bath under reflux conditions for 24 hours.

| <i>Entry</i> | <i>Experimental Procedure</i>                                                                                                                                                                                                                                                                                                                         | <i>Remarks</i>                                                                                                                                                                                                                              |
|--------------|-------------------------------------------------------------------------------------------------------------------------------------------------------------------------------------------------------------------------------------------------------------------------------------------------------------------------------------------------------|---------------------------------------------------------------------------------------------------------------------------------------------------------------------------------------------------------------------------------------------|
| <b>1</b>     | CAN (1.5 equiv., 0.4117 g), 4-Iodoanisole ( <b>1a</b> , 0.5 mmol, 0.117 g) and K <sub>2</sub> CO <sub>3</sub> (1 equiv., 0.068 g) were taken in 2 mL DMF. After 24 h, TLC of the reaction was developed in 20% ethyl acetate/hexane system.                                                                                                           | The cyanated product, <b>3a</b> was not observed in the developed TLC of the reaction mixture.                                                                                                                                              |
| <b>2</b>     | Pd(OAc) <sub>2</sub> (30 mol%, 0.15 mmol, 0.034 g), CAN (1.5 equiv., 0.75 mmol, 0.411 g), 4-Iodoanisole ( <b>1a</b> , 0.5 mmol, 0.117 g) and K <sub>2</sub> CO <sub>3</sub> (1 equiv., 0.068 g) were taken in 2 mL DMF. After 24 h, TLC of the reaction was developed in 20% ethyl acetate/hexane system.                                             | The reaction mixture was extracted in ethyl acetate, dried over anhydrous Na <sub>2</sub> SO <sub>4</sub> and concentrated in a rotary evaporator. The product was purified through column chromatography and isolated in <b>50%</b> yield  |
| <b>3</b>     | Ni(OAc) <sub>2</sub> ·4H <sub>2</sub> O (30 mol%, 0.15 mmol, 0.039 g), CAN (1.5 equiv., 0.75 mmol, 0.411 g), 4-Iodoanisole ( <b>1a</b> , 0.5 mmol, 0.117 g) and K <sub>2</sub> CO <sub>3</sub> (1 equiv., 0.068 g) were taken in 2 mL DMF. After 24 h, TLC of the reaction was developed in 20% ethyl acetate/hexane system.                          | The reaction mixture was extracted in ethyl acetate, dried over anhydrous Na <sub>2</sub> SO <sub>4</sub> and concentrated in a rotary evaporator. The product was purified through column chromatography and isolated in <b>35%</b> yield  |
| <b>4</b>     | Cu(OTf) <sub>2</sub> (30 mol%, 0.15 mmol, 0.054 g), CeCl <sub>3</sub> ·7H <sub>2</sub> O (1.5 equiv., 0.75 mmol, 0.411 g), 4-Iodoanisole ( <b>1a</b> , 0.5 mmol, 0.117 g) and K <sub>2</sub> CO <sub>3</sub> (1 equiv., 0.068 g) were taken in 2 mL DMF. After 24 h, TLC of the reaction was developed in 20% ethyl acetate/hexane system.            | The cyanated product was not observed in the developed TLC of the reaction mixture.                                                                                                                                                         |
| <b>5</b>     | Cu(OTf) <sub>2</sub> (30 mol%, 0.15 mmol, 0.054 g), NH <sub>4</sub> (SO <sub>4</sub> ) <sub>2</sub> (1.5 equiv., 0.75 mmol, 0.098 g), 4-Iodoanisole ( <b>1a</b> , 0.5 mmol, 0.117 g) and K <sub>2</sub> CO <sub>3</sub> (1 equiv., 0.068 g) were taken in 2 mL DMF. After 24 h, TLC of the reaction was developed in 20% ethyl acetate/hexane system. | The reaction mixture was extracted in ethyl acetate, dried over anhydrous Na <sub>2</sub> SO <sub>4</sub> and concentrated in a rotary evaporator. The product was purified through column chromatography and isolated in <b>55%</b> yield. |

|   |                                                                                                                                                                                                                                                                                                                                       |                                                                                                                                                                                                                                             |
|---|---------------------------------------------------------------------------------------------------------------------------------------------------------------------------------------------------------------------------------------------------------------------------------------------------------------------------------------|---------------------------------------------------------------------------------------------------------------------------------------------------------------------------------------------------------------------------------------------|
| 6 | Cu(OTf) <sub>2</sub> (30 mol%, 0.15 mmol, 0.054 g), 4-Iodoanisole ( <b>1a</b> , 0.5 mmol, 0.117 g) and K <sub>2</sub> CO <sub>3</sub> (1 equiv., 0.068 g) were taken in 2 mL DMF. After 24 h, TLC of the reaction was developed in 20% ethyl acetate/hexane system.                                                                   | The cyanated product was not observed in the developed TLC of the reaction mixture.                                                                                                                                                         |
| 7 | Cu(OTf) <sub>2</sub> (30 mol%, 0.15 mmol, 0.054 g), CAN (1.5 equiv., 0.4117 g), 4-Iodoanisole ( <b>1a</b> , 0.5 mmol, 0.117 g) and K <sub>2</sub> CO <sub>3</sub> (1 equiv., 0.068 g) were taken in 2 mL DMF and stirred under nitrogen atmosphere. After 24 h, TLC of the reaction was developed in 20% ethyl acetate/hexane system. | The reaction mixture was extracted in ethyl acetate, dried over anhydrous Na <sub>2</sub> SO <sub>4</sub> and concentrated in a rotary evaporator. The product was purified through column chromatography and isolated in <b>85%</b> yield. |
| 8 | Cu(OTf) <sub>2</sub> (30 mol%, 0.15 mmol, 0.054 g), CAN (1.5 equiv., 0.4117 g), 4-Iodoanisole ( <b>1a</b> , 0.5 mmol, 0.117 g) and KCl (1 equiv., 0.037 g) were taken in 2 mL DMF. After 24 h, TLC of the reaction was developed in 20% ethyl acetate/hexane system.                                                                  | The cyanated product was not observed in the developed TLC of the reaction mixture.                                                                                                                                                         |

#### 4. Copies of $^1\text{H}$ and $^{13}\text{C}$ NMR spectra of the aryl nitrile derivatives

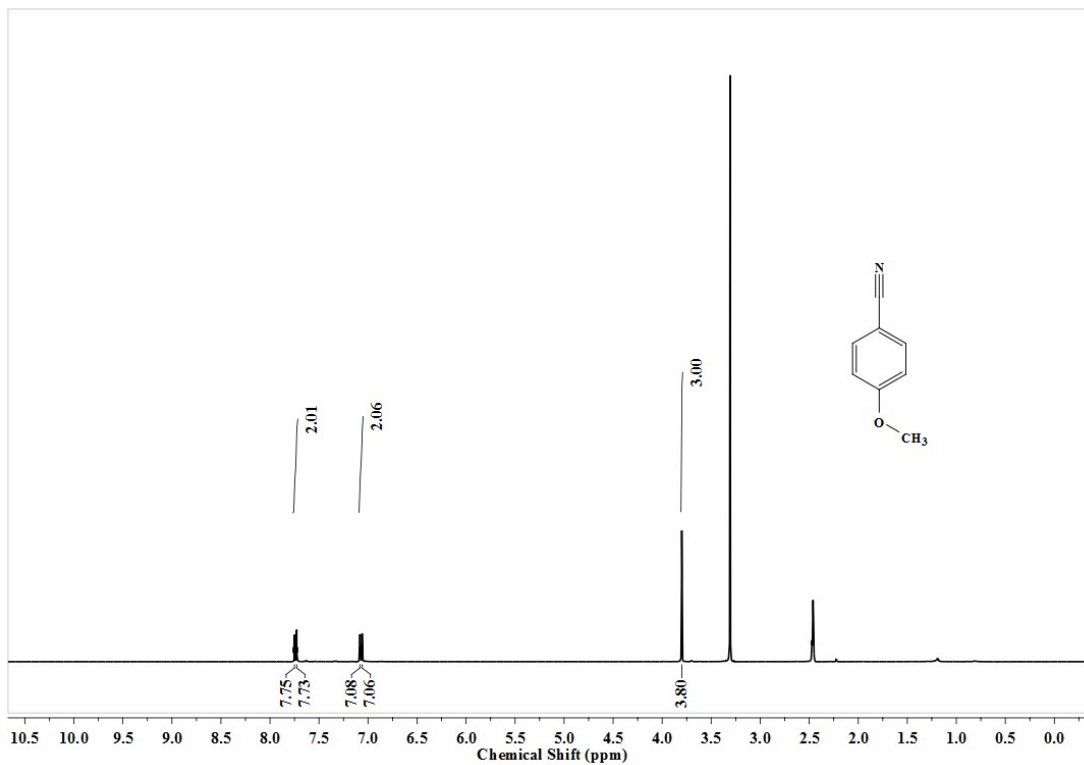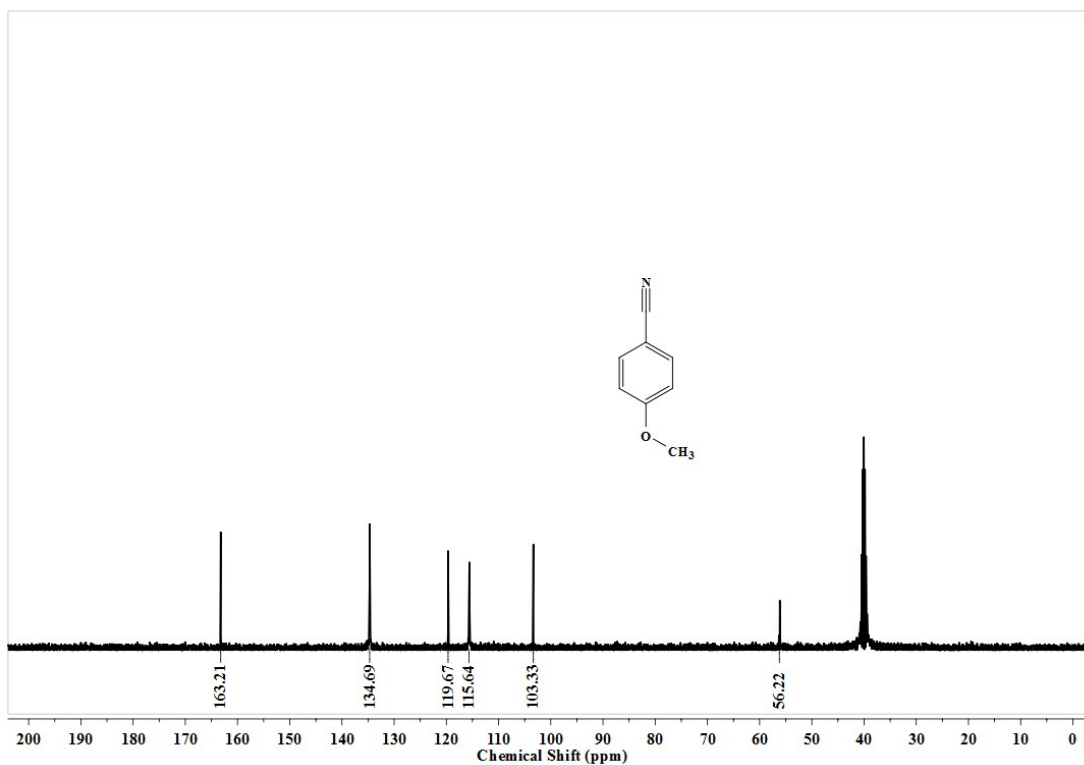

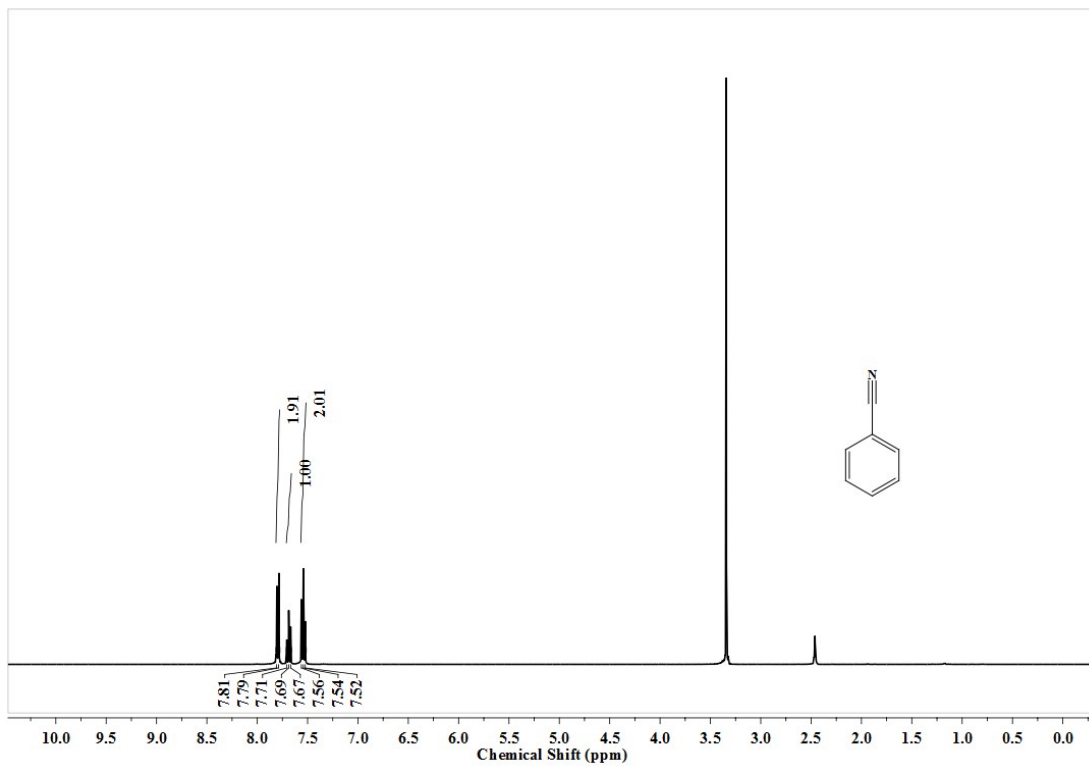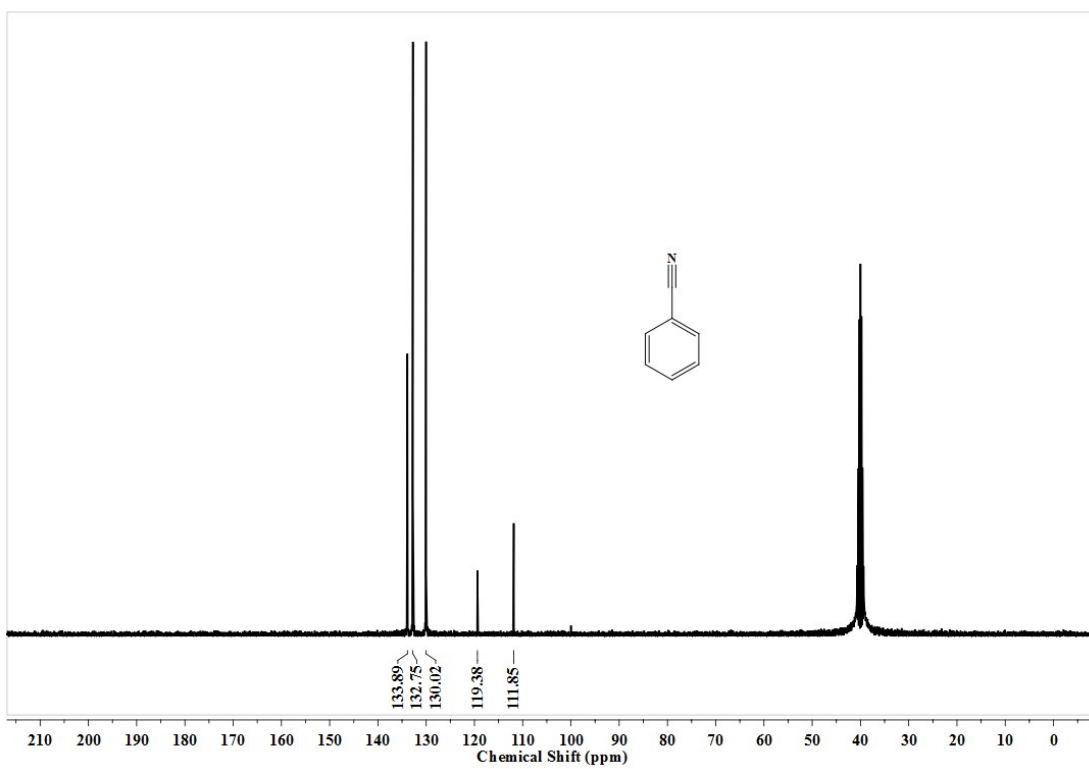

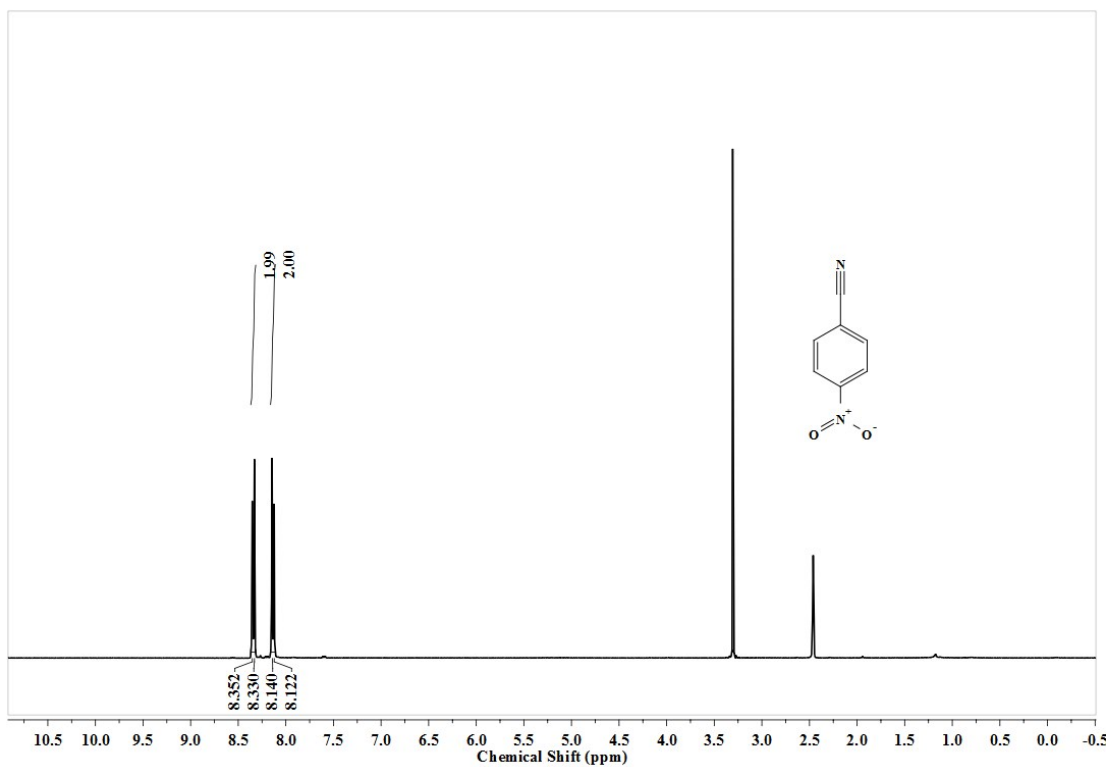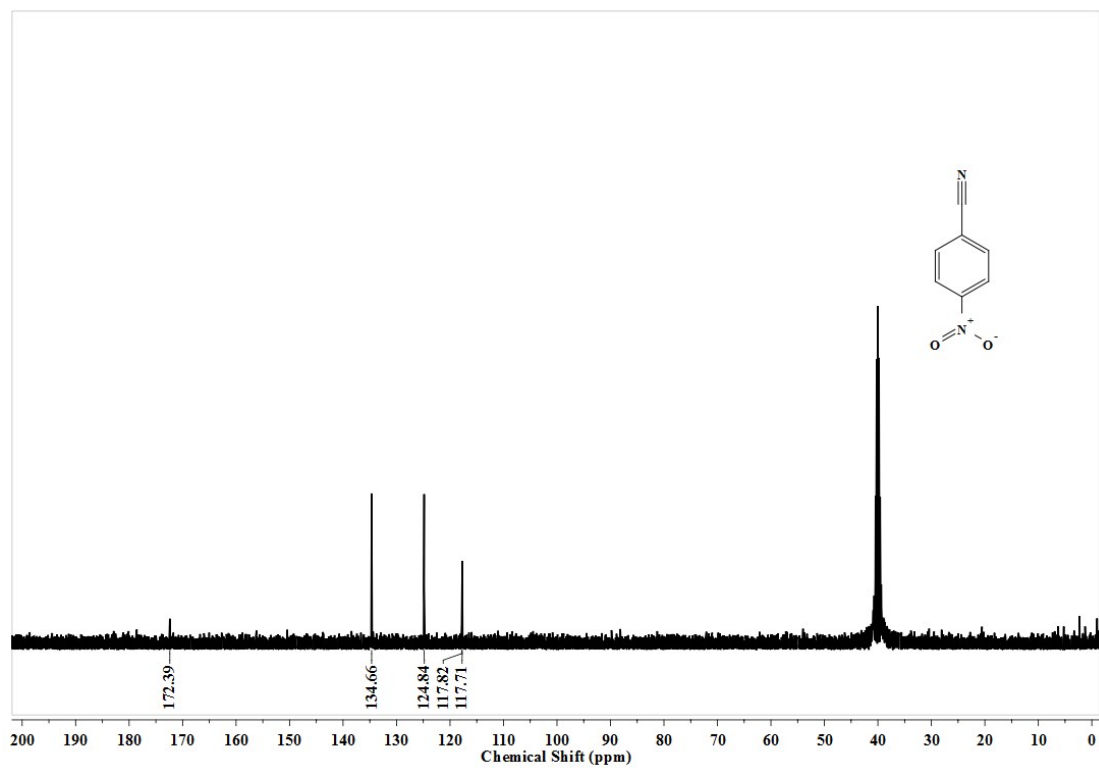

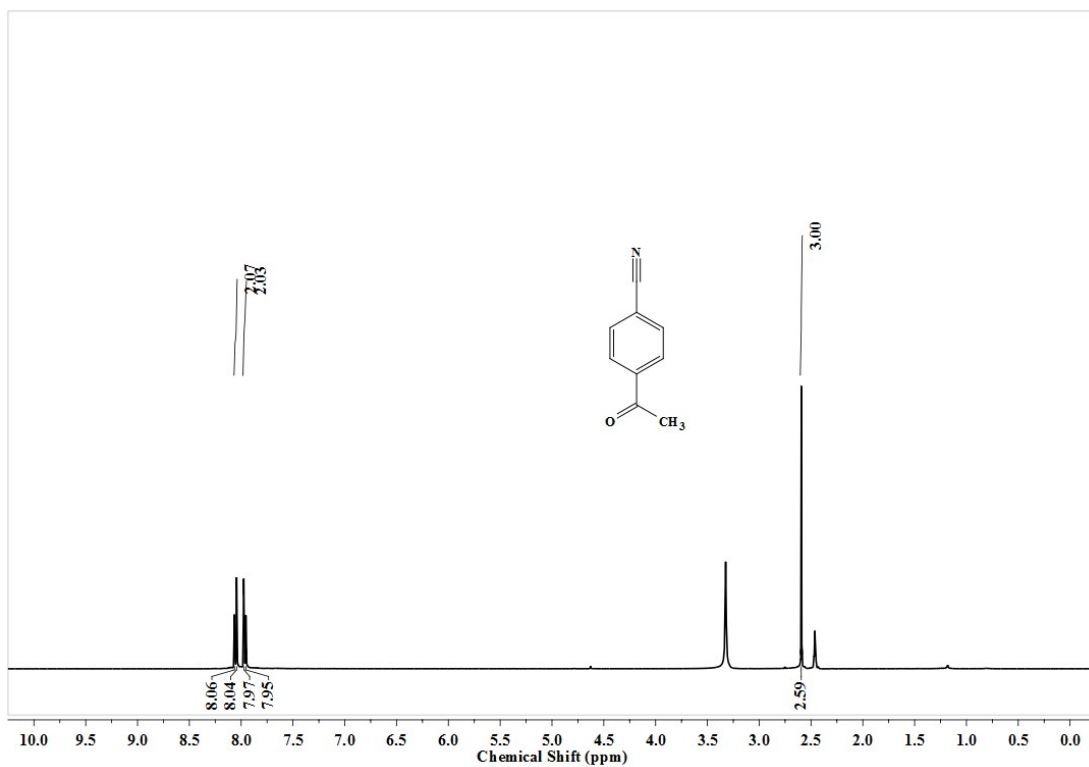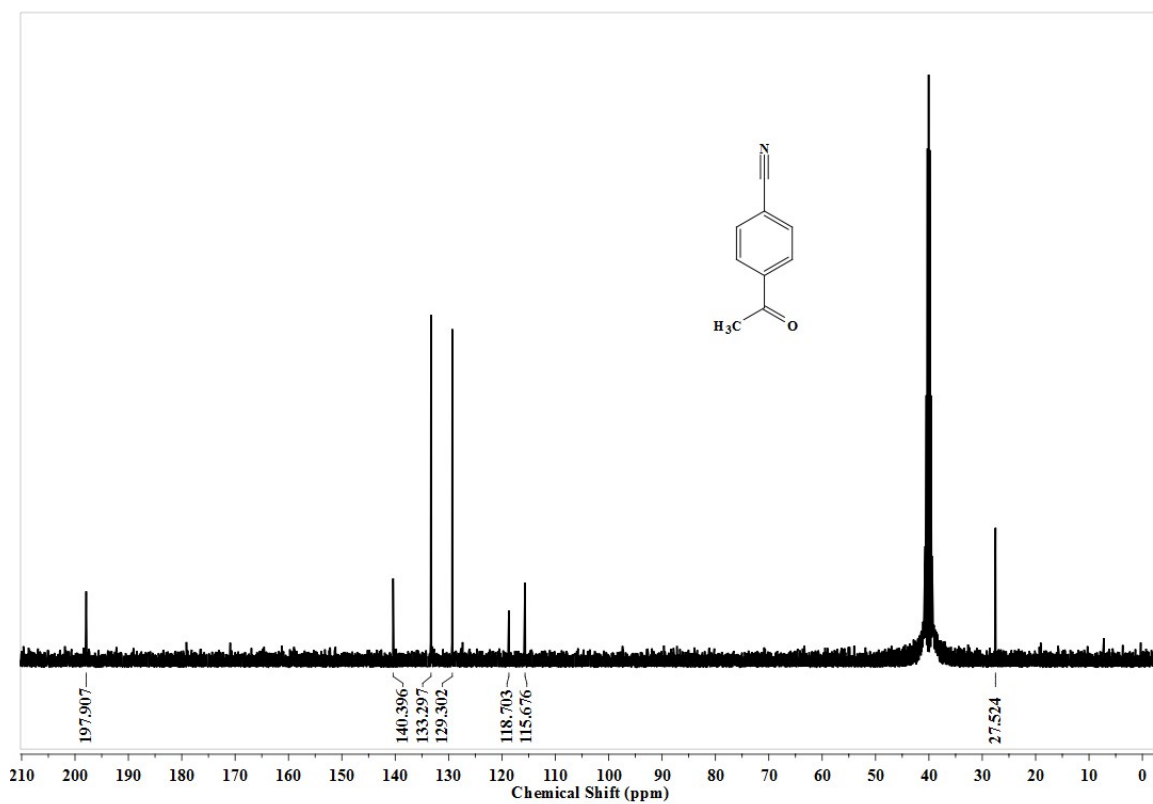



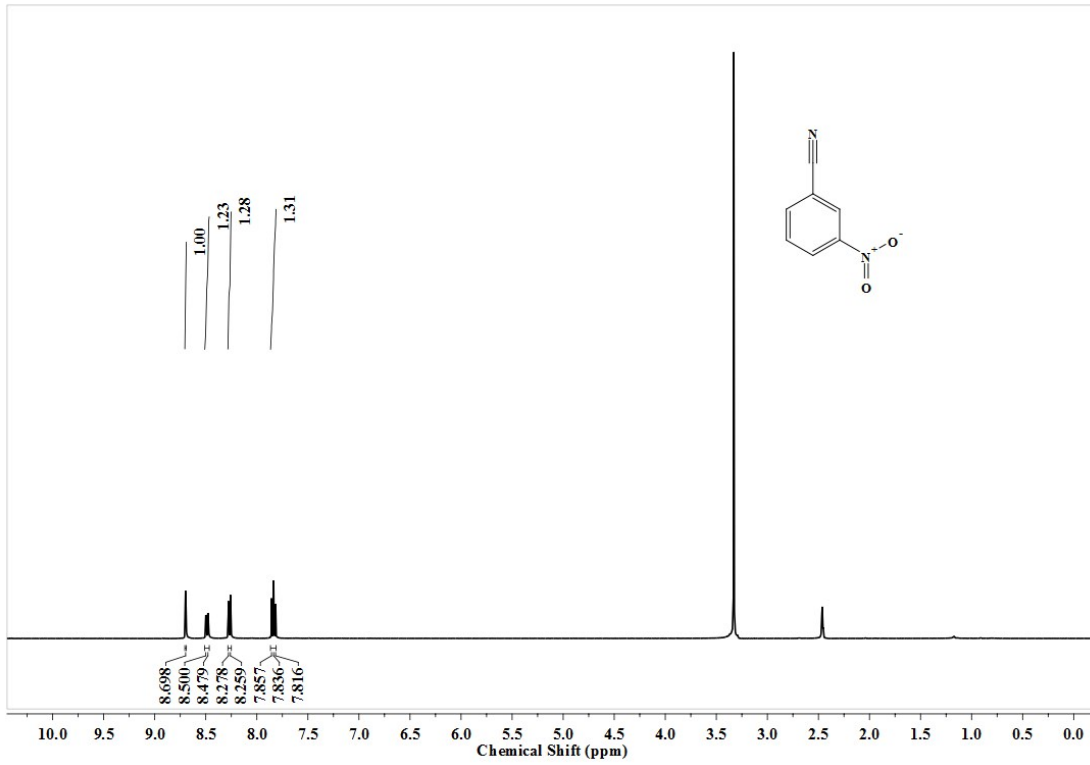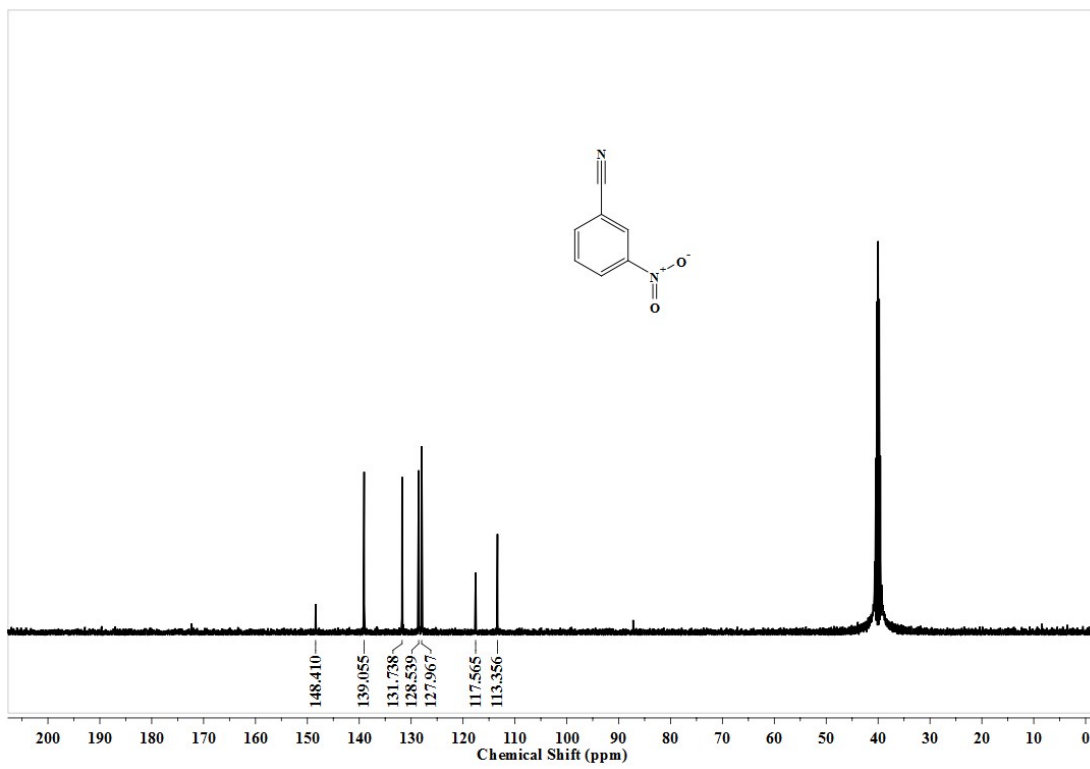

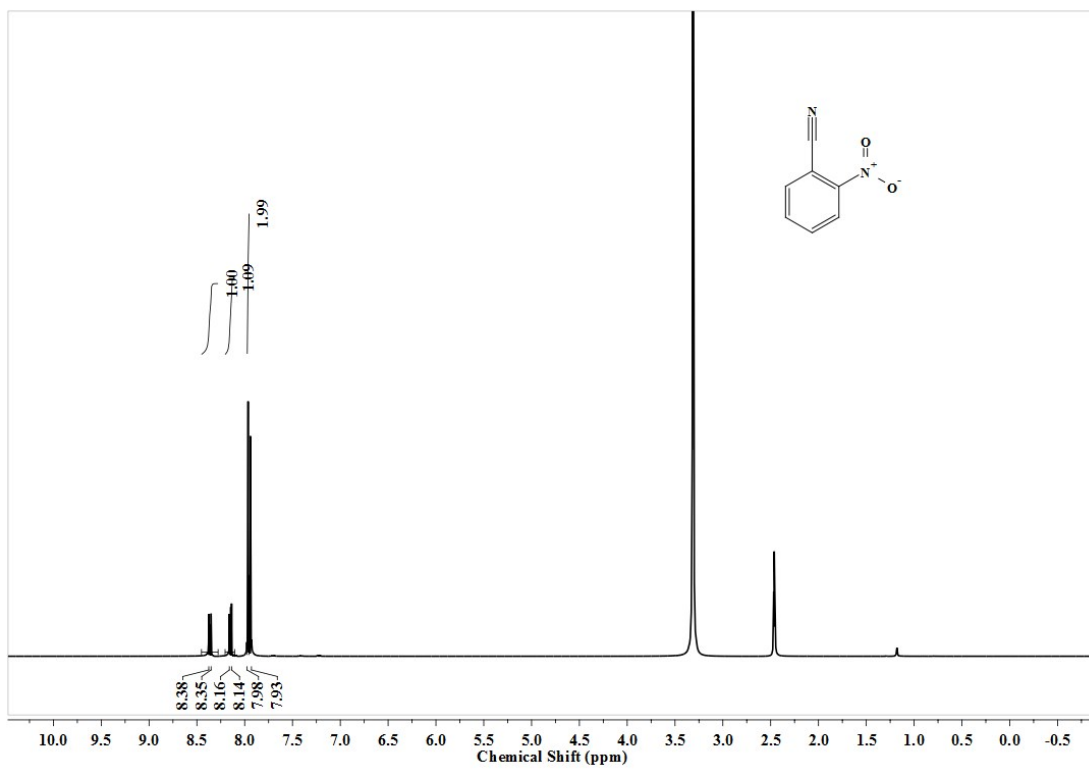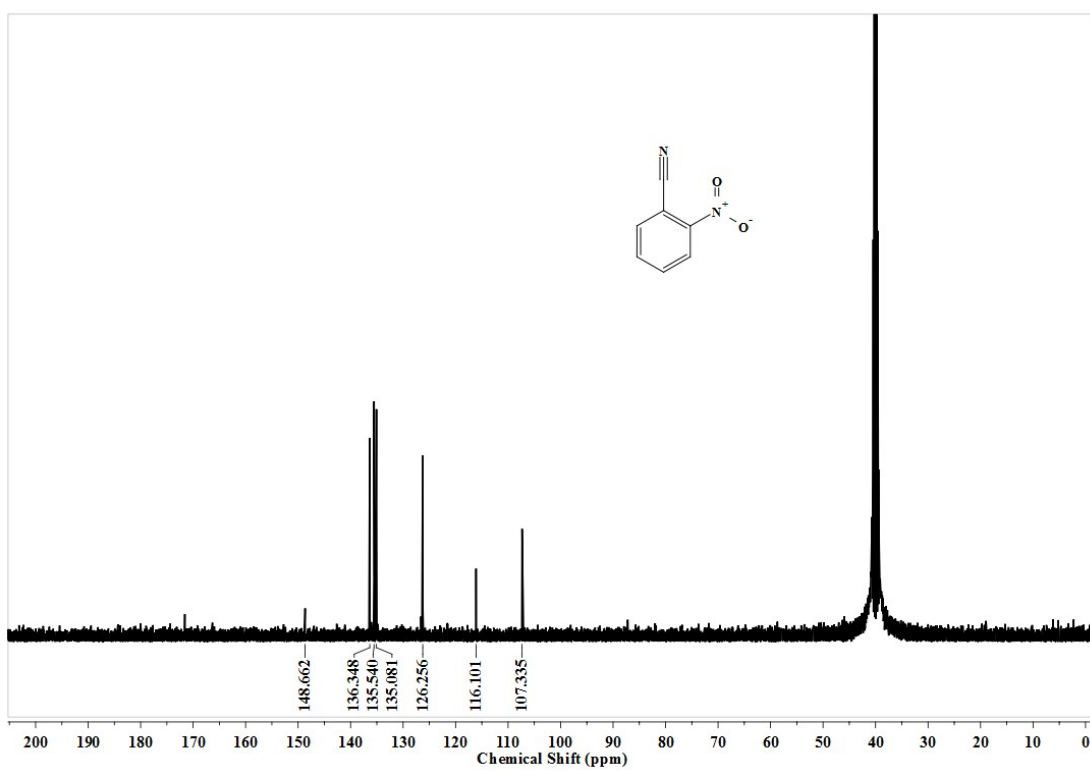

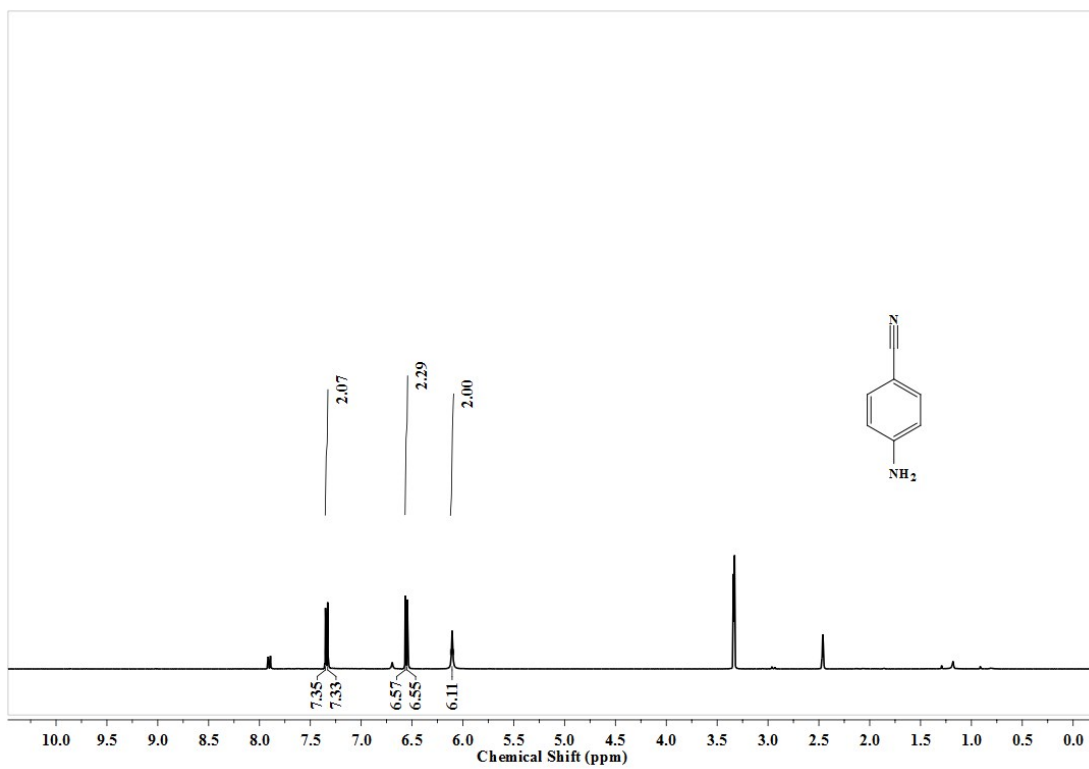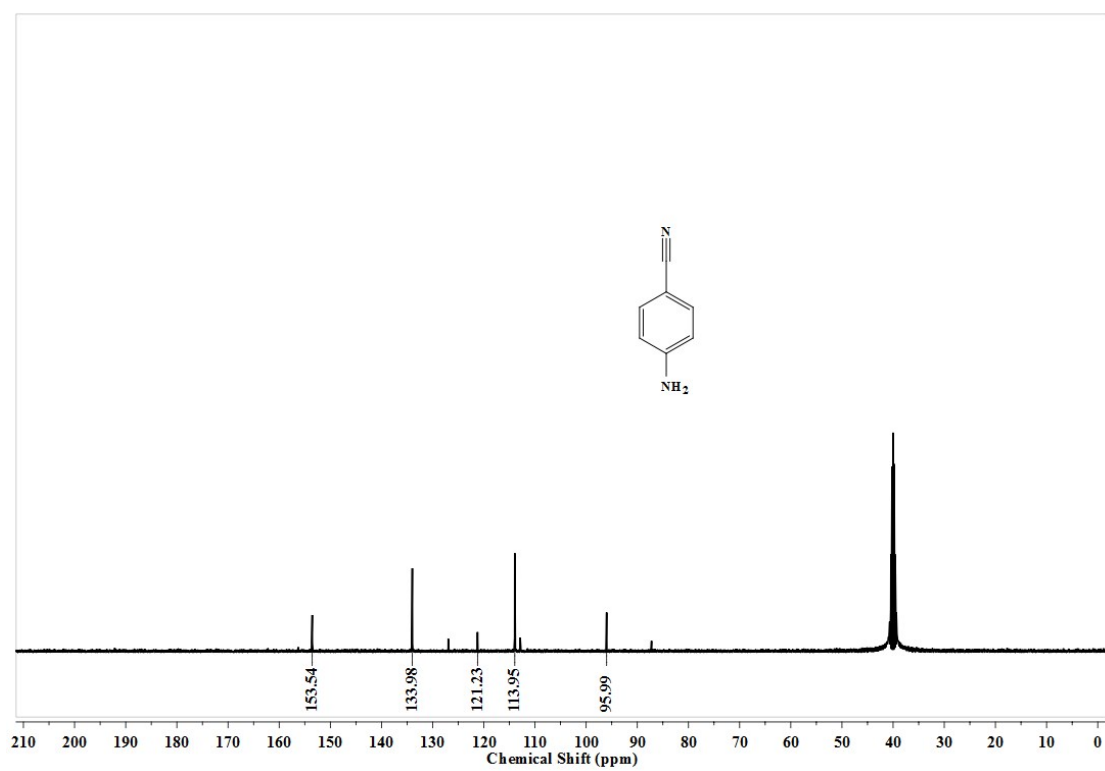

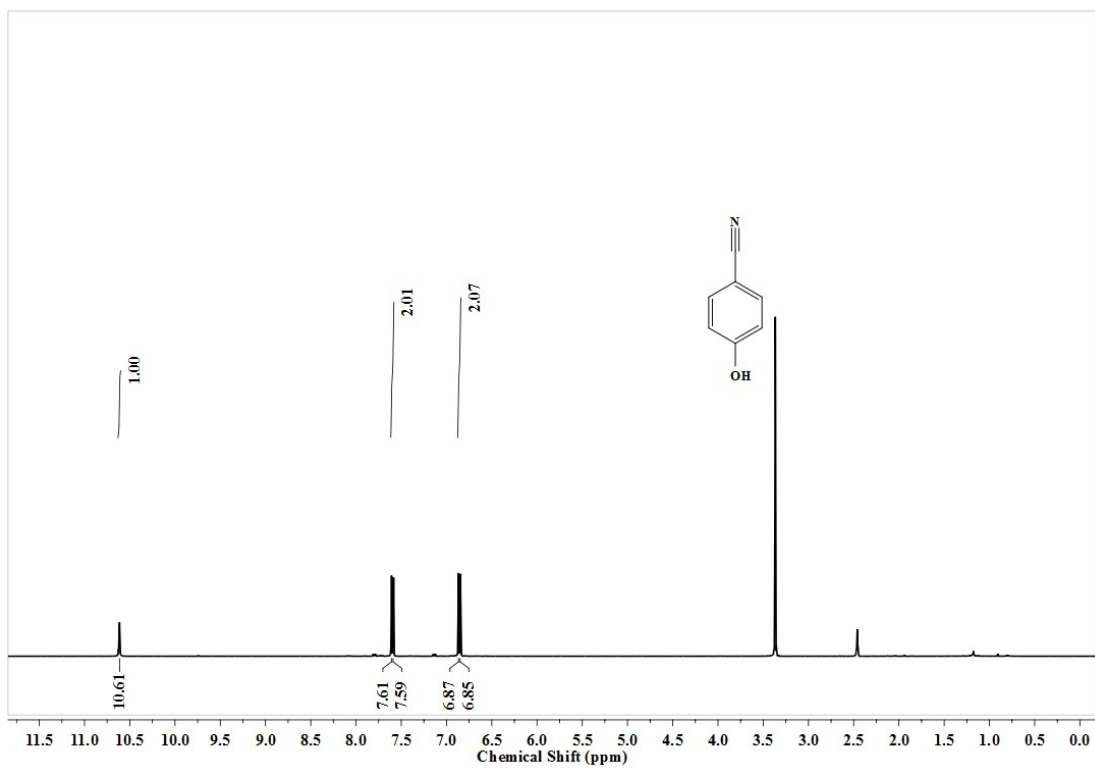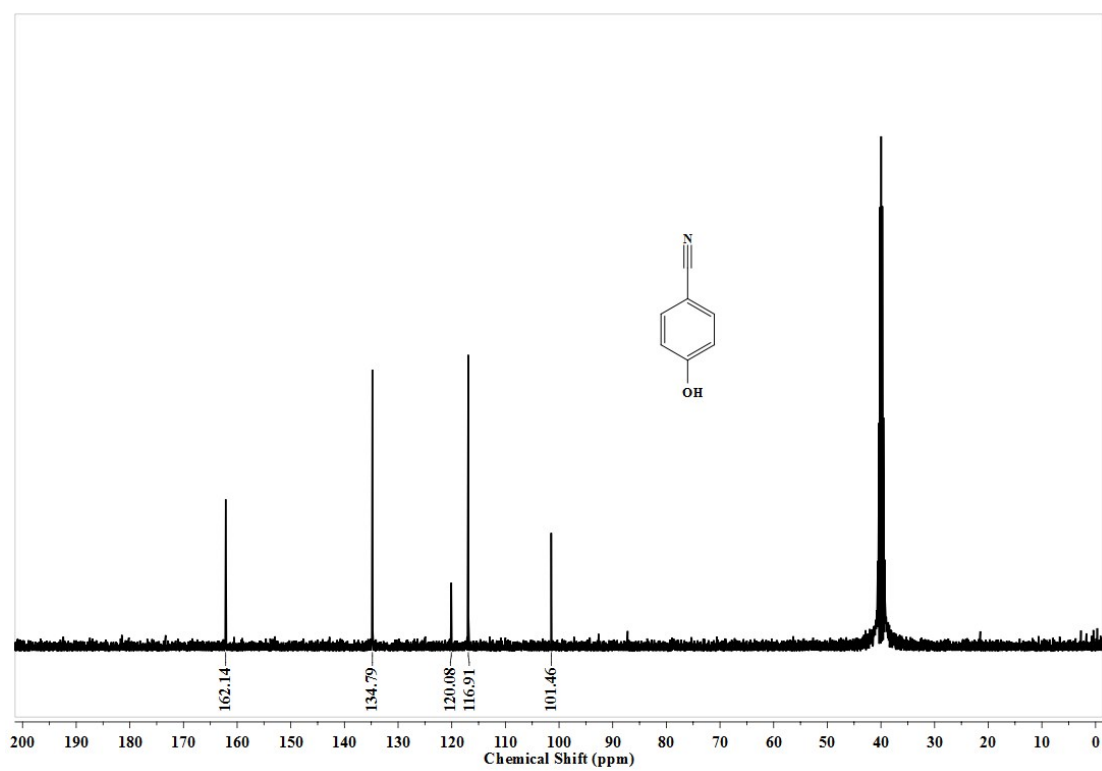

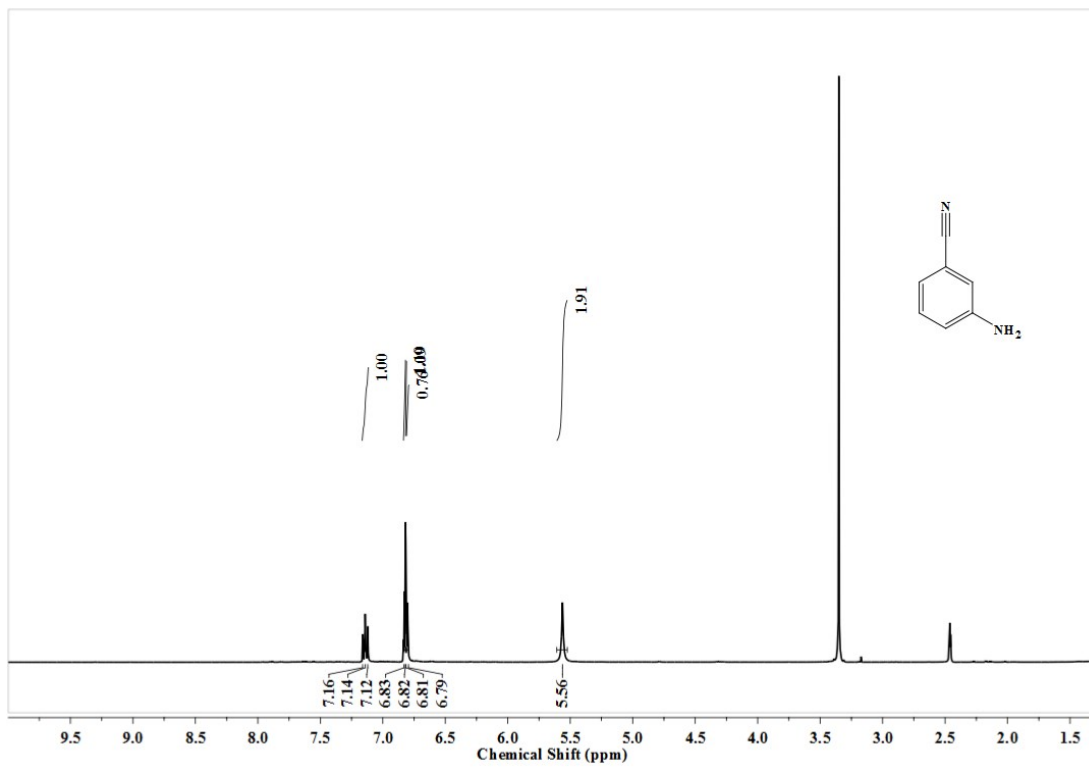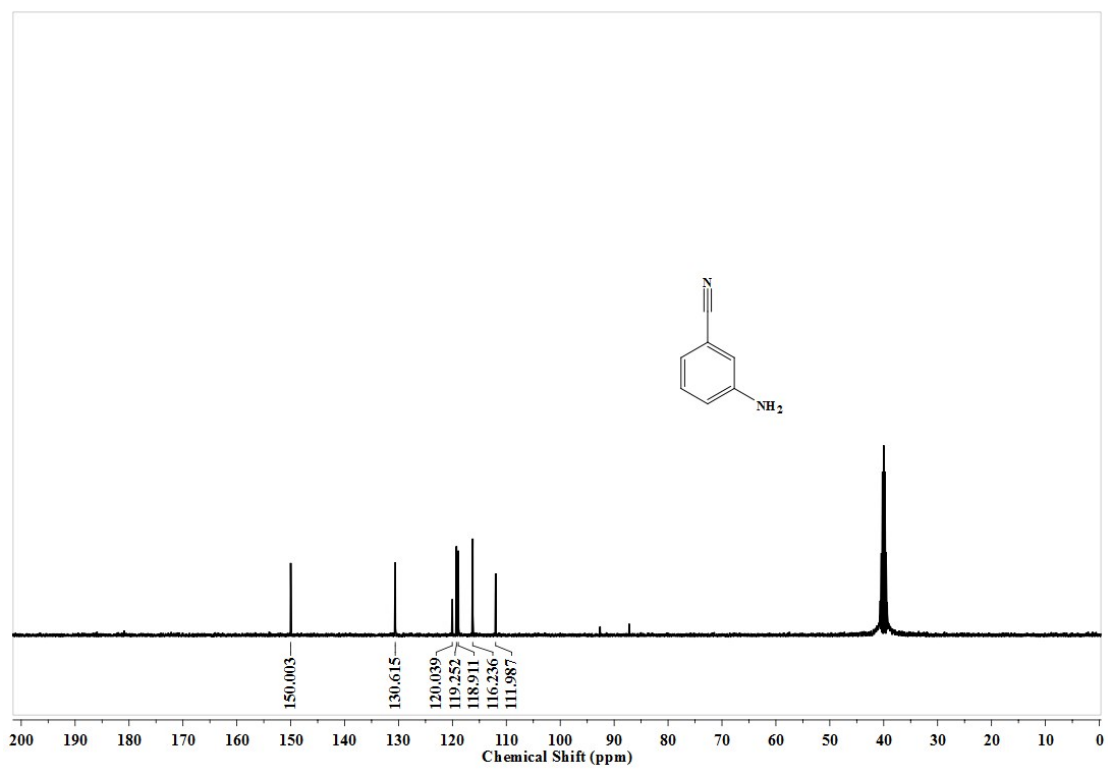

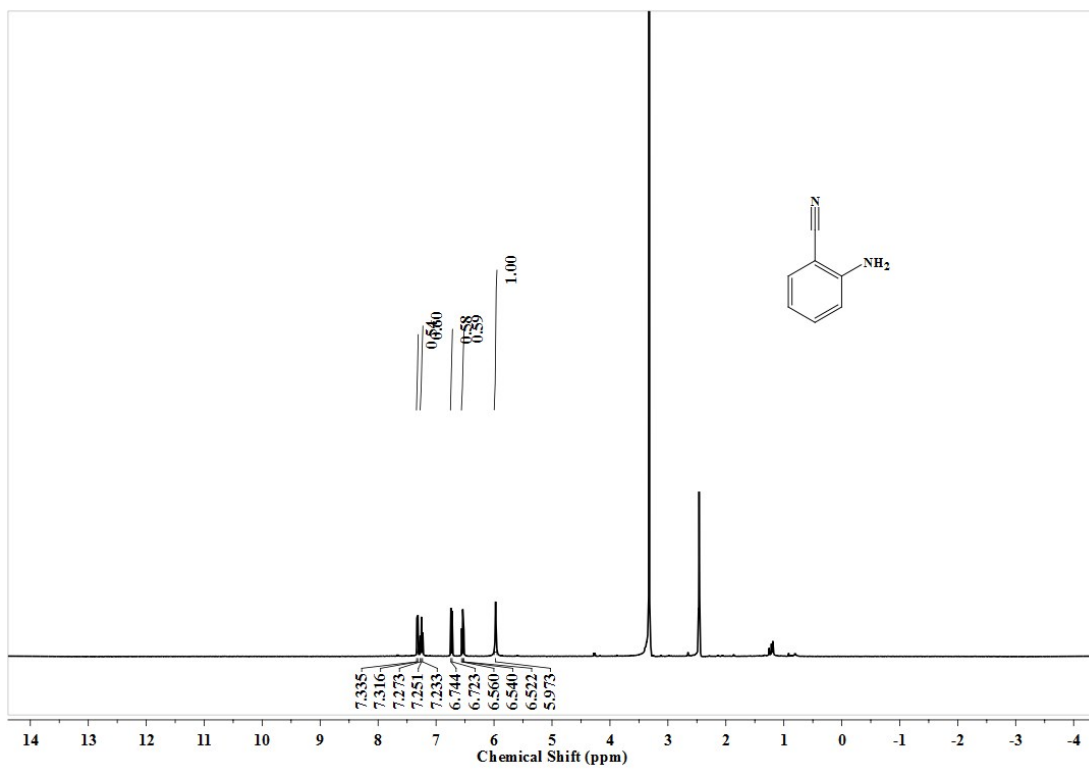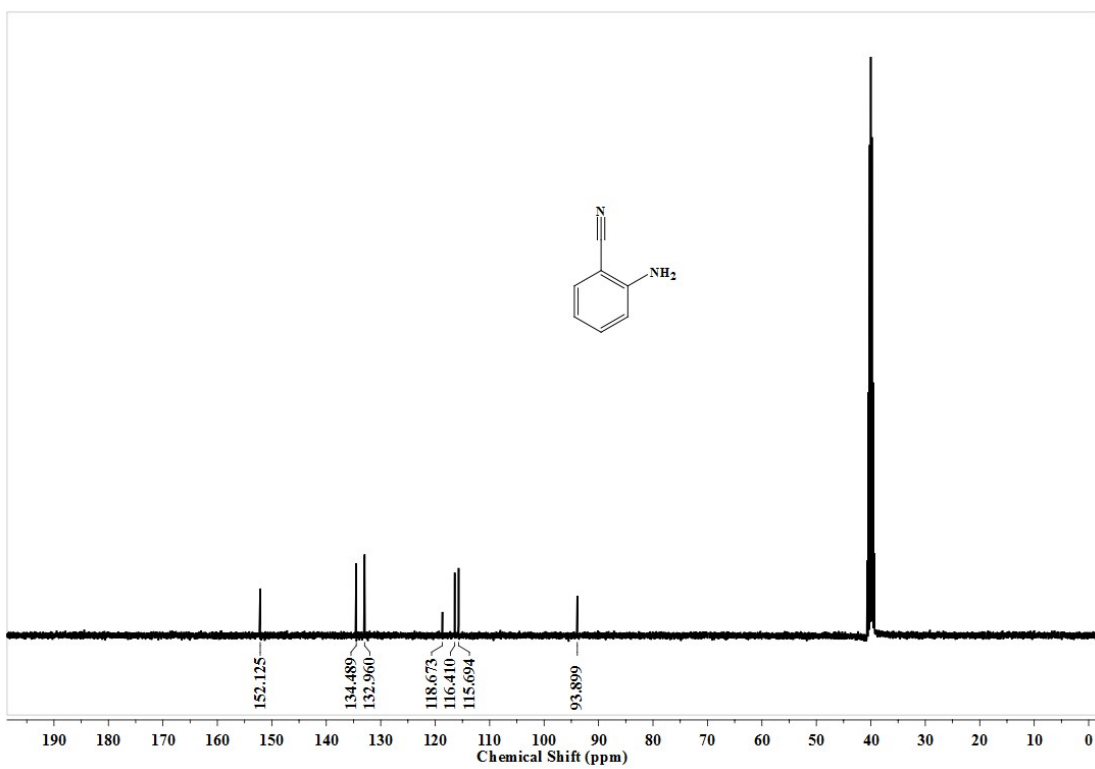

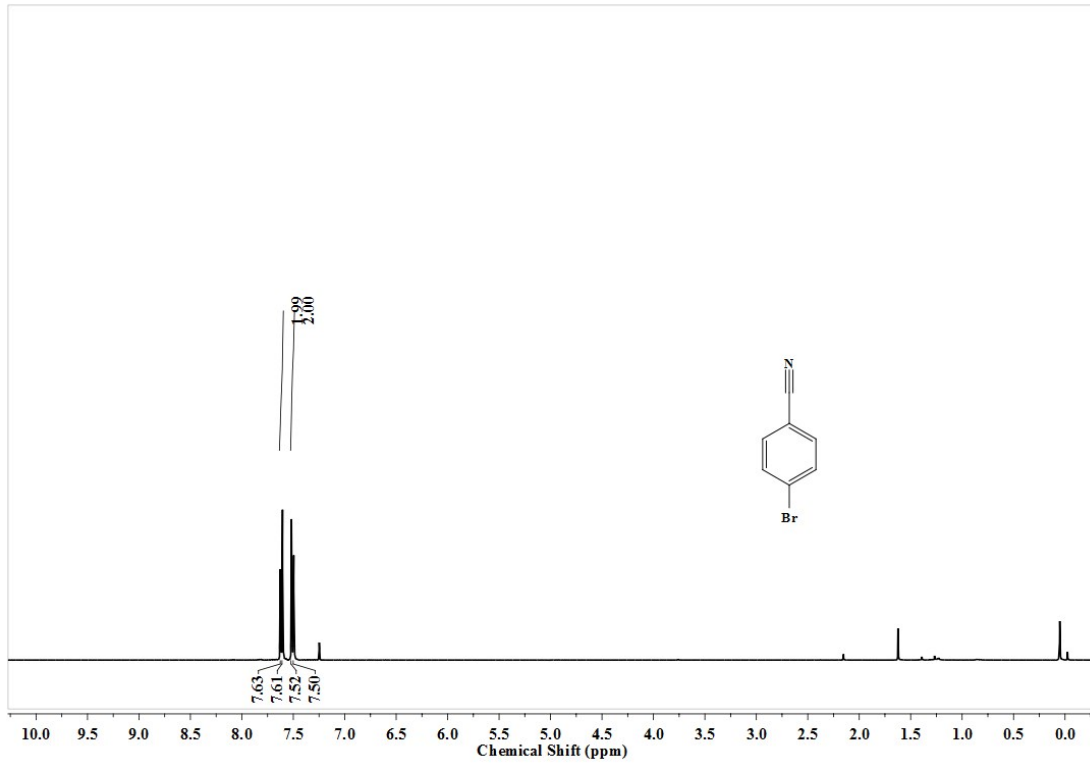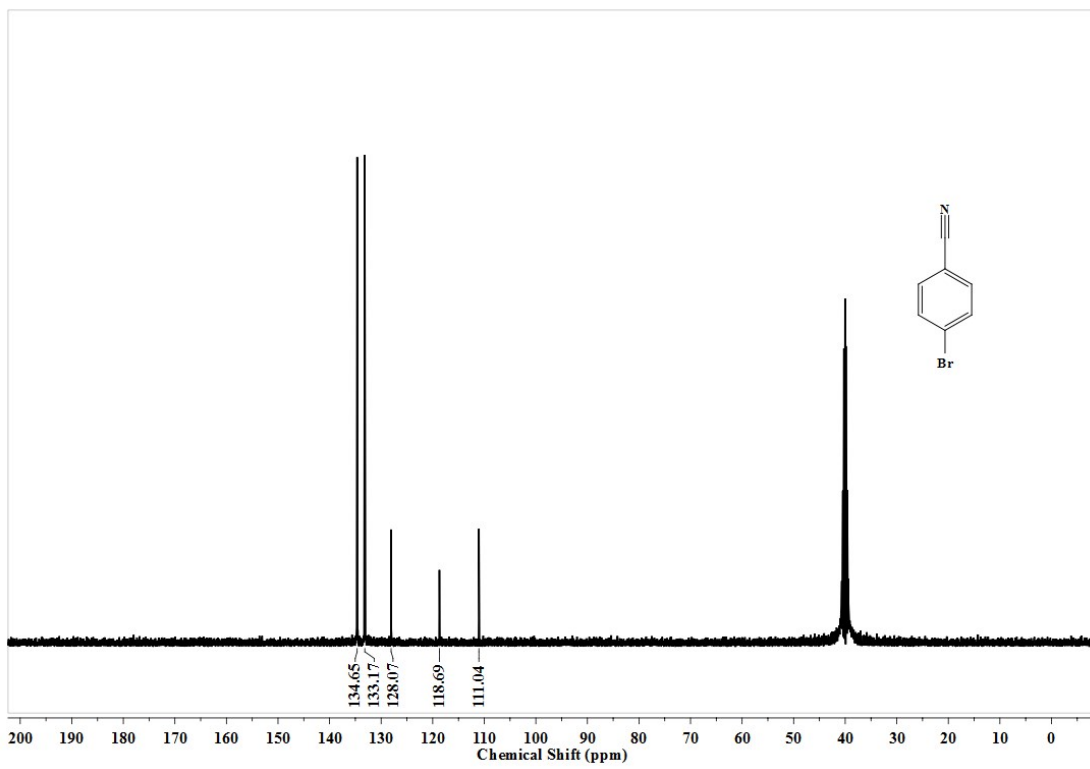

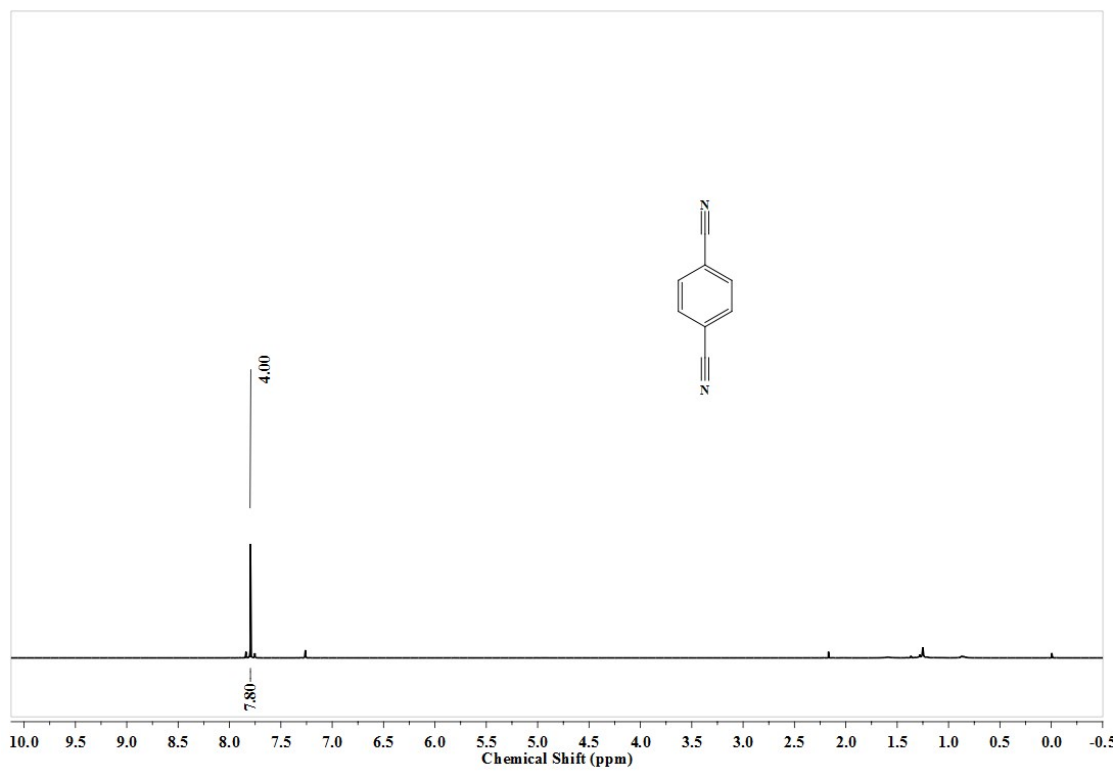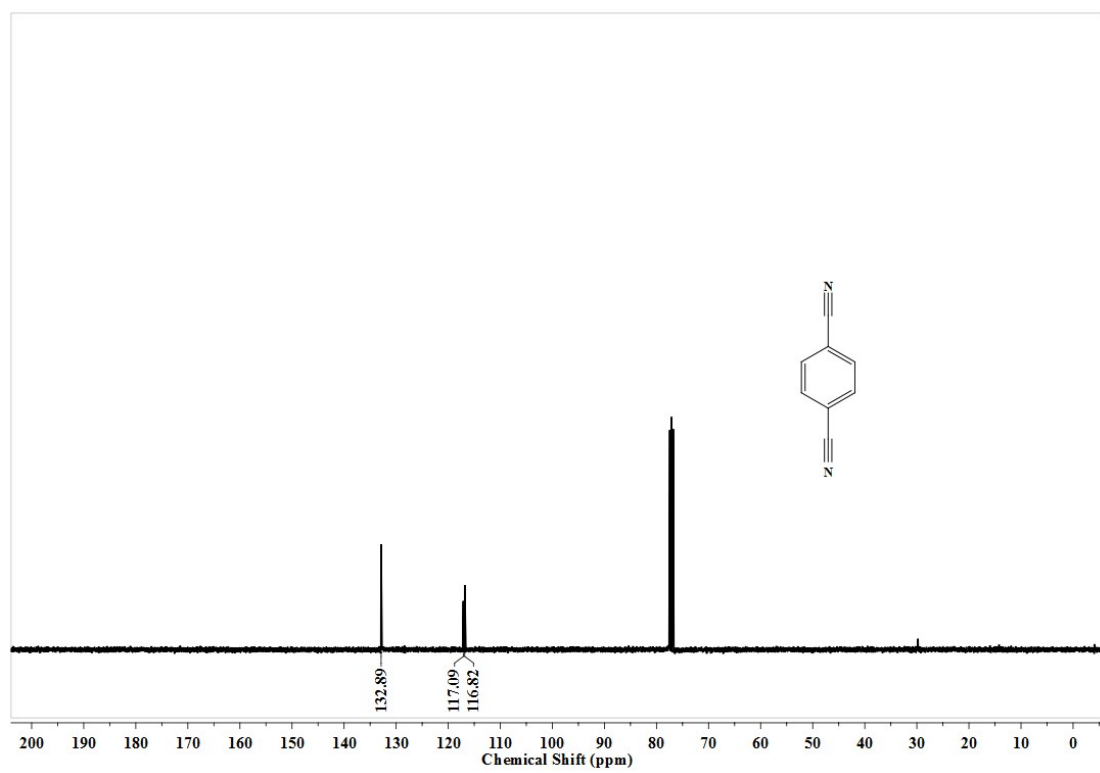



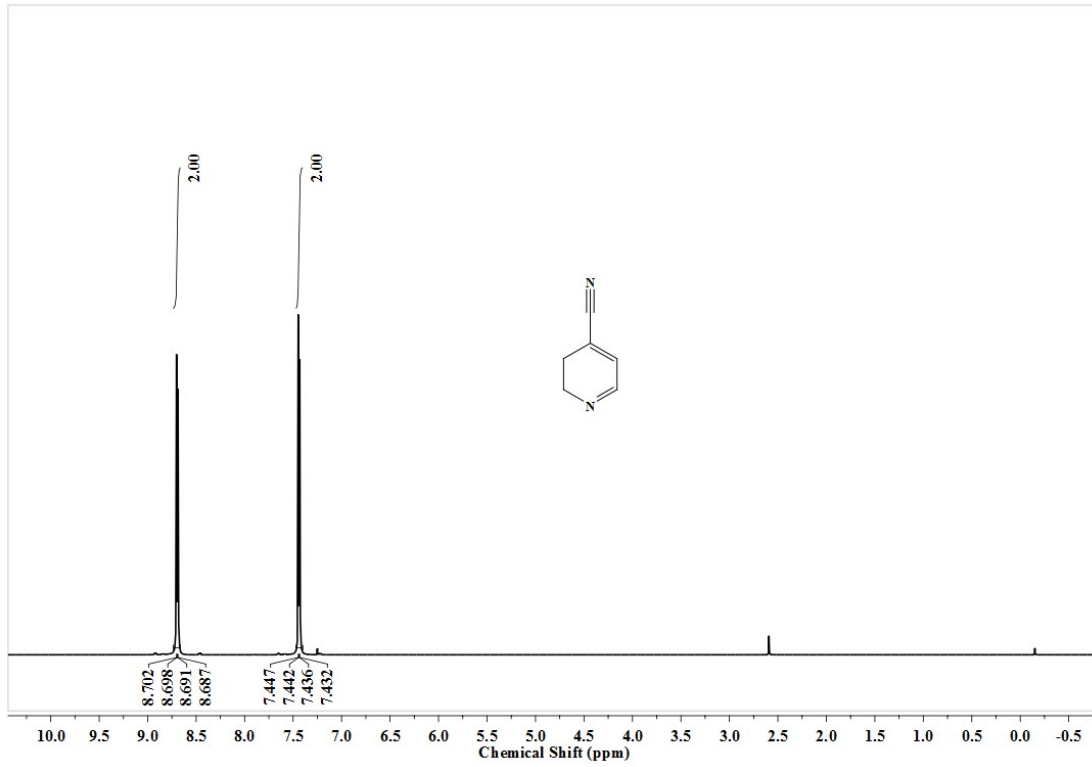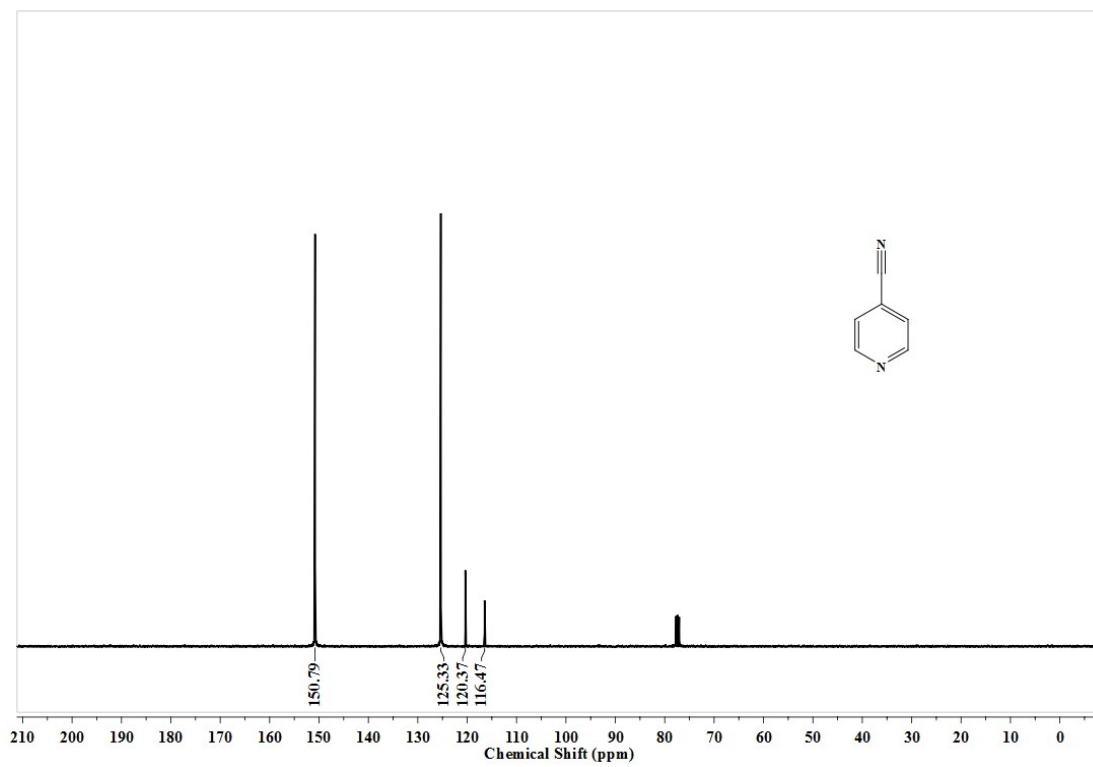

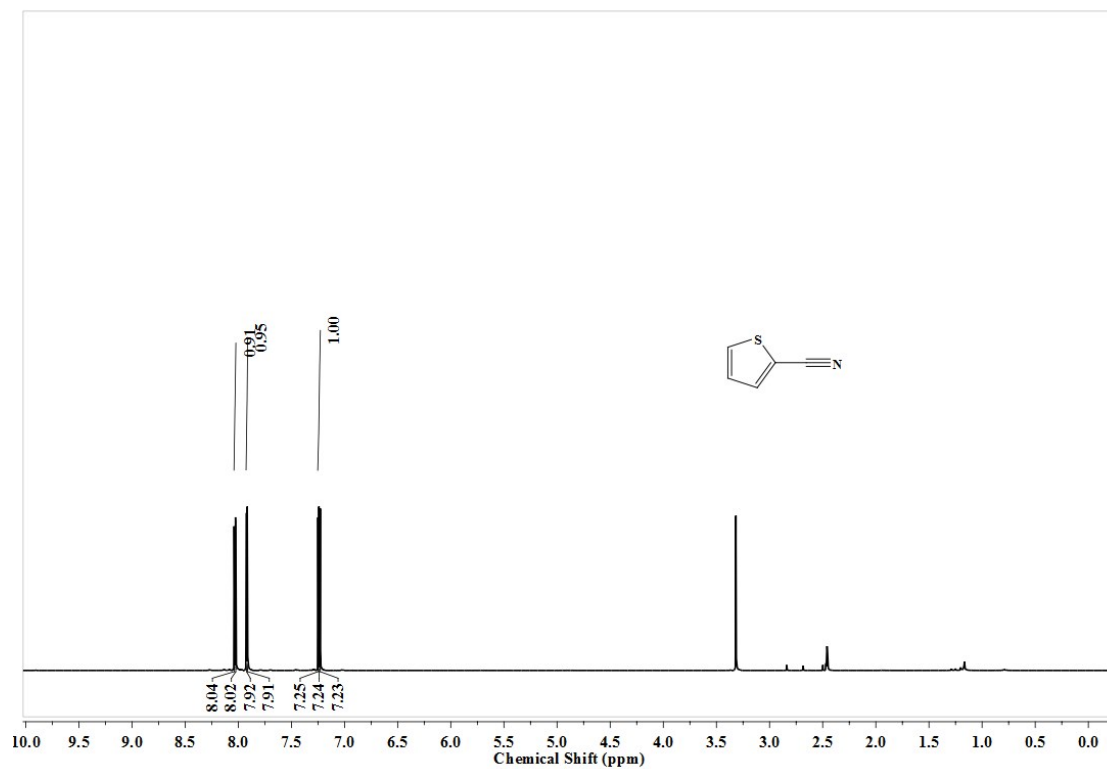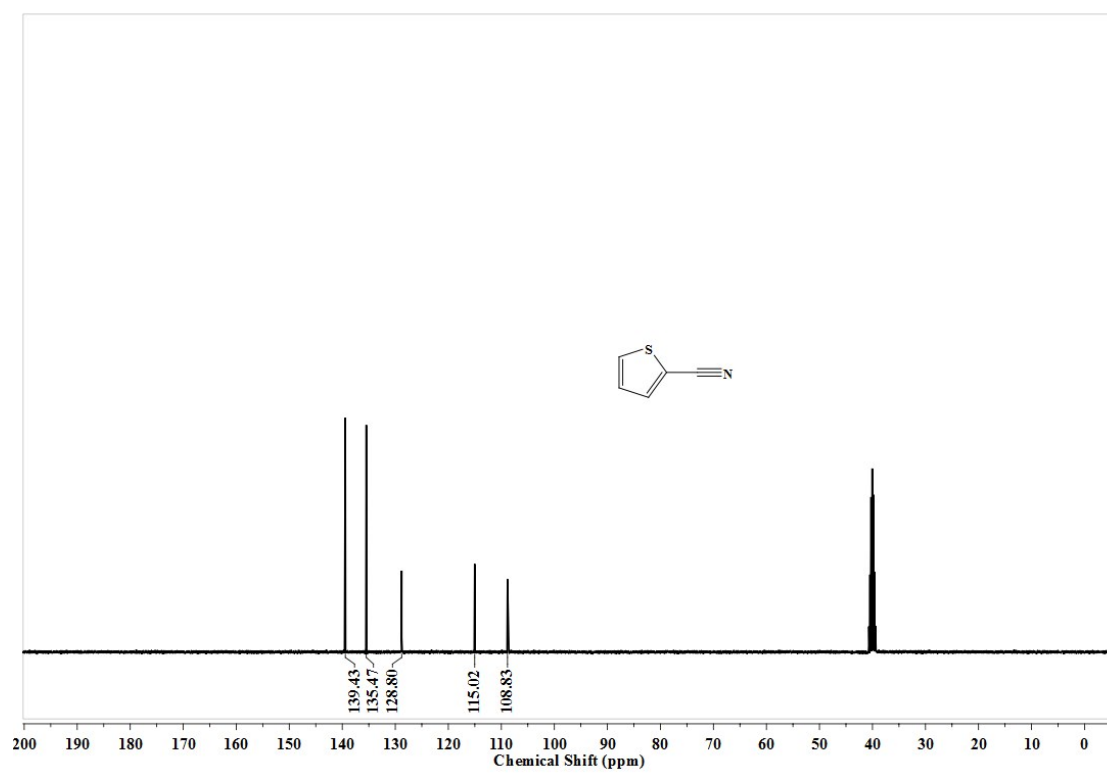

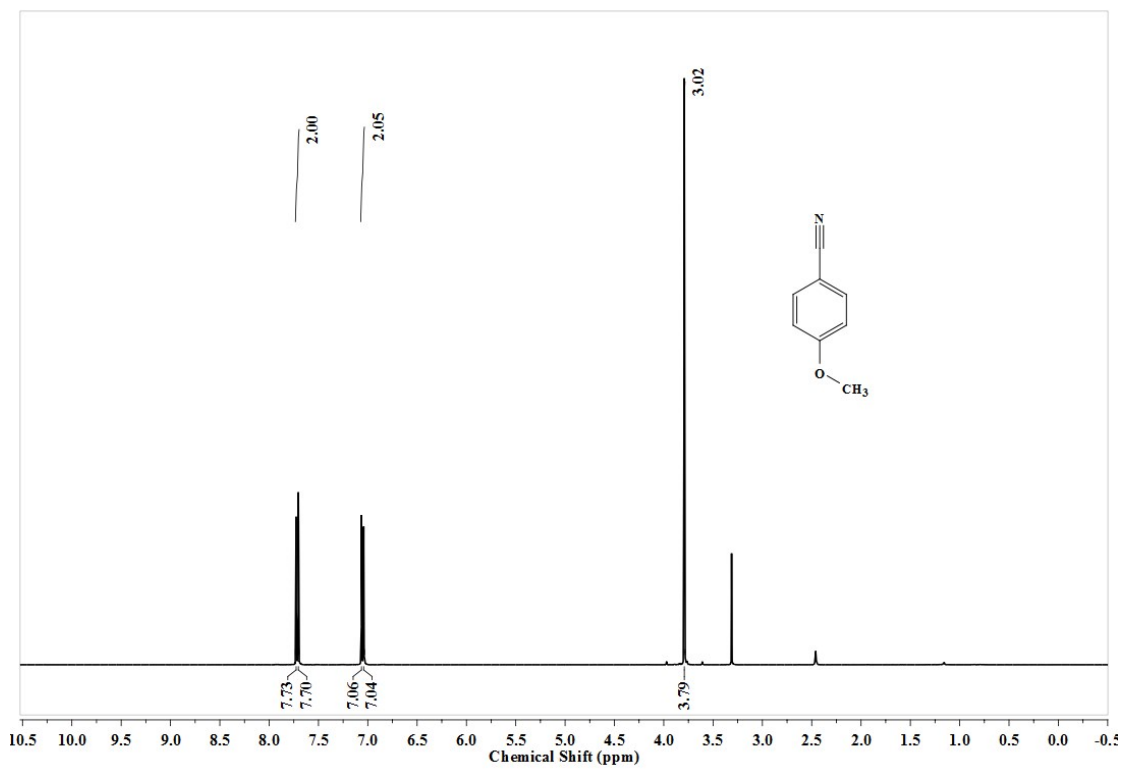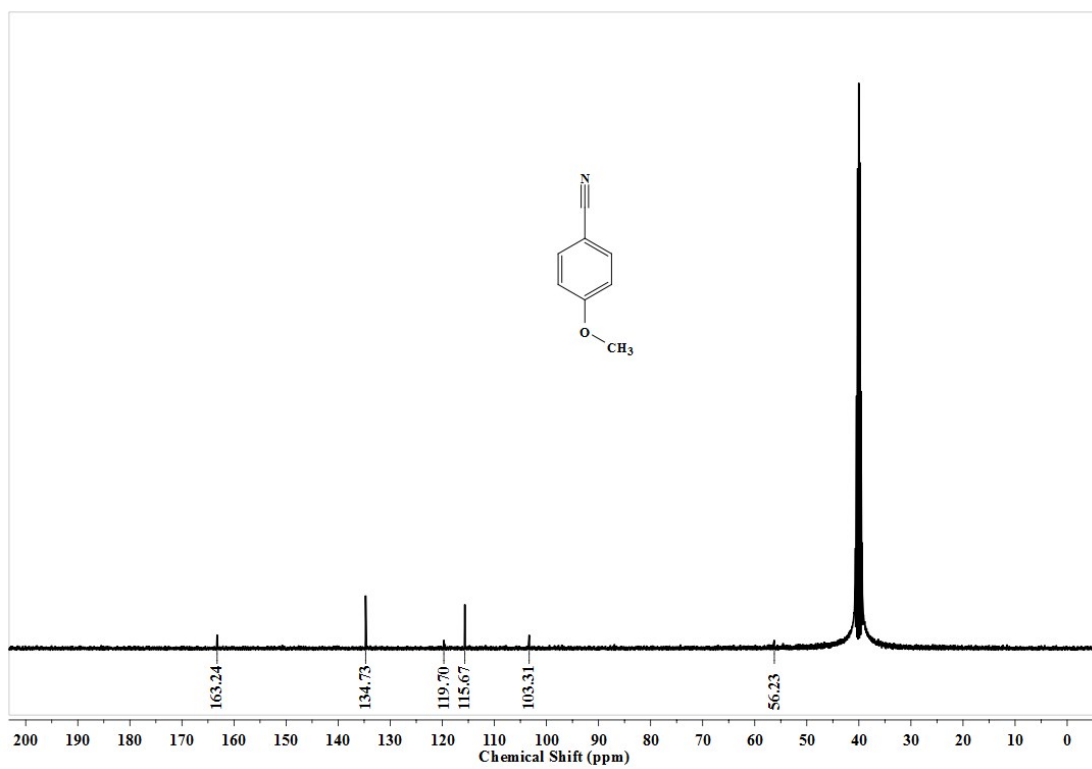

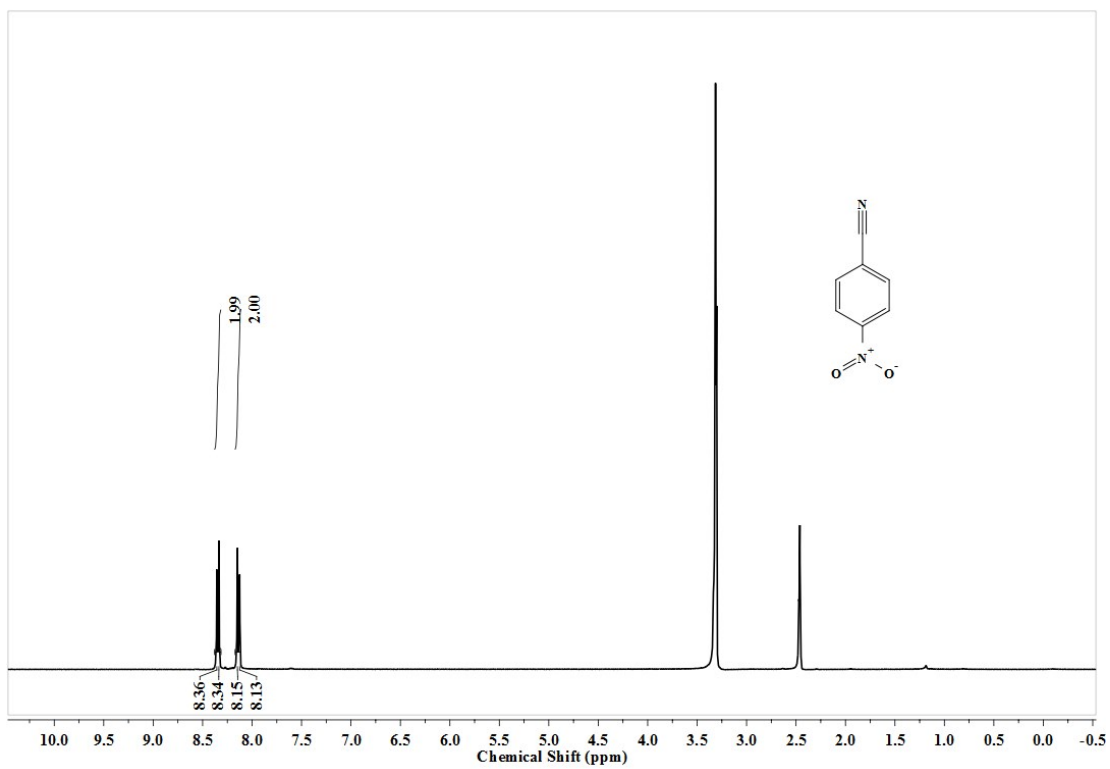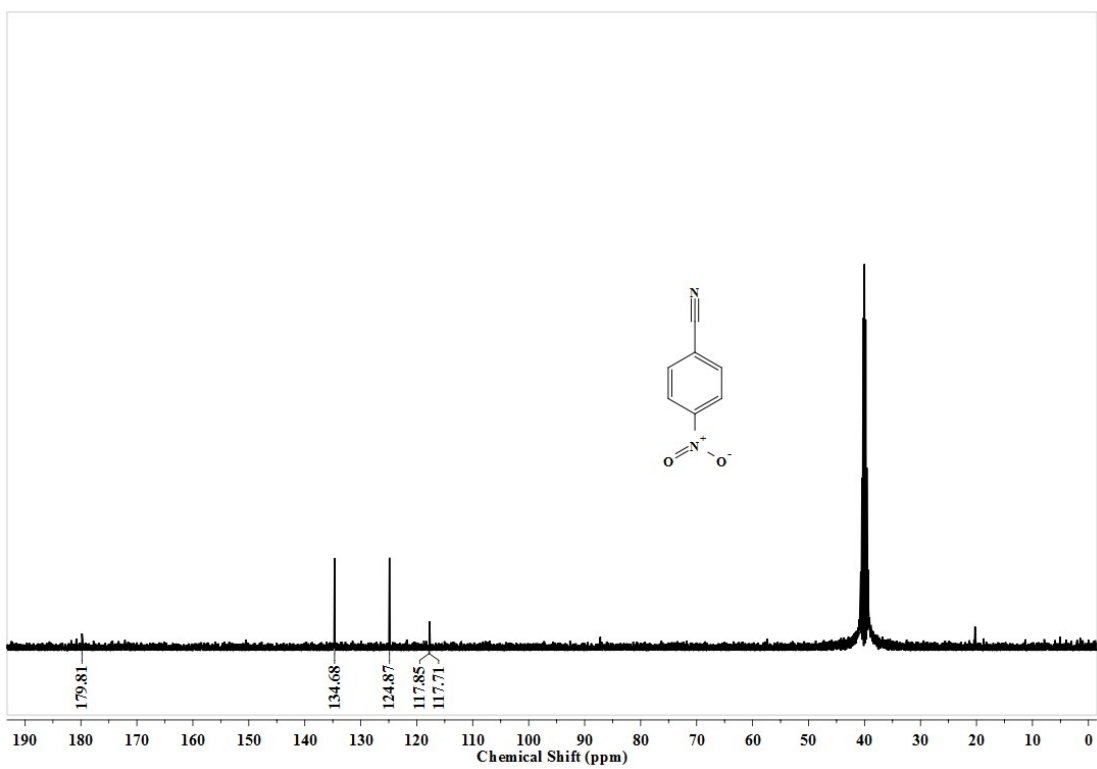

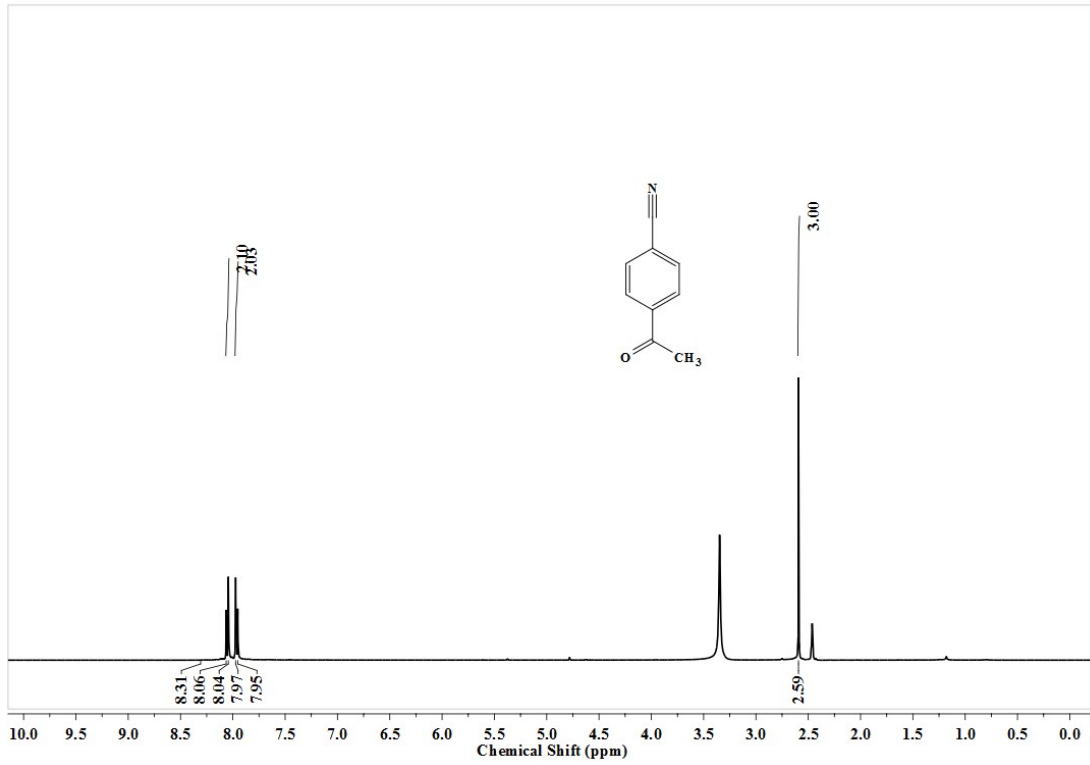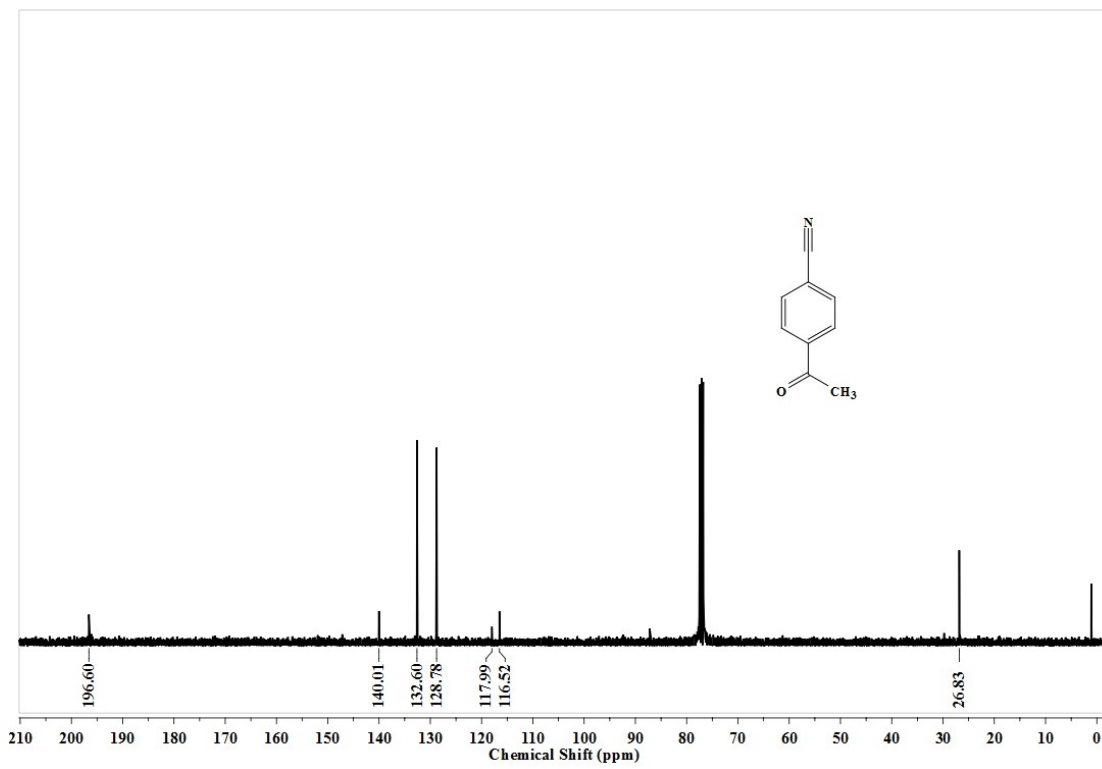

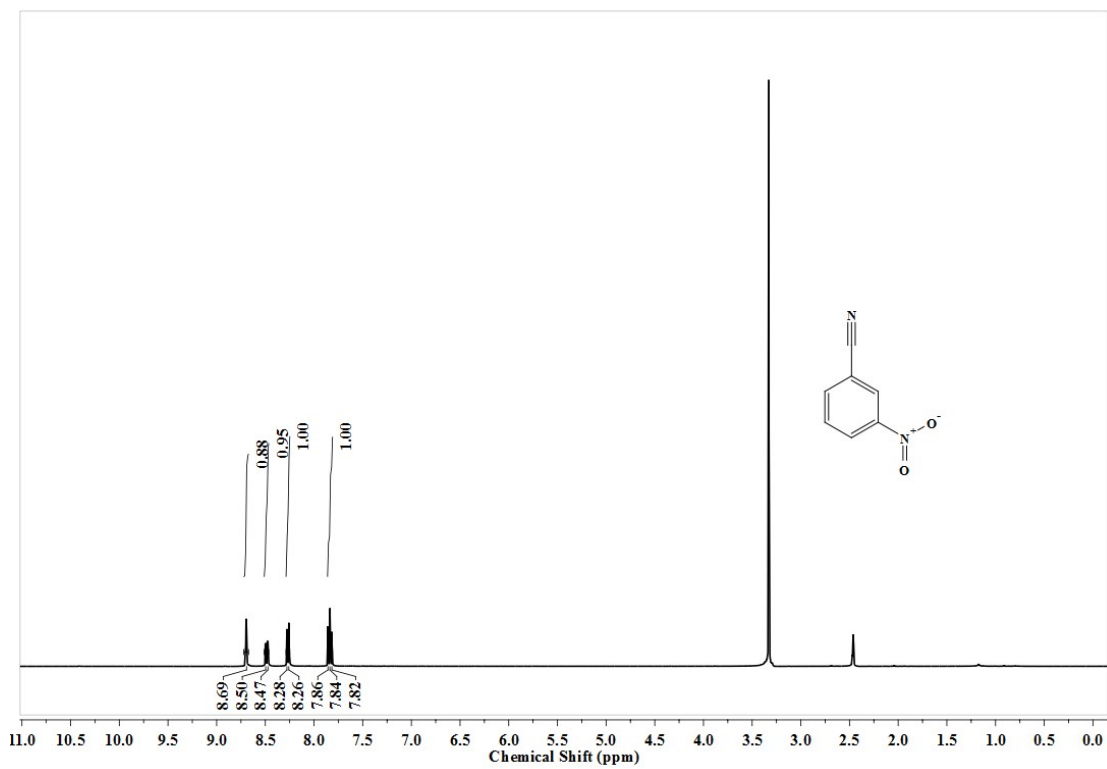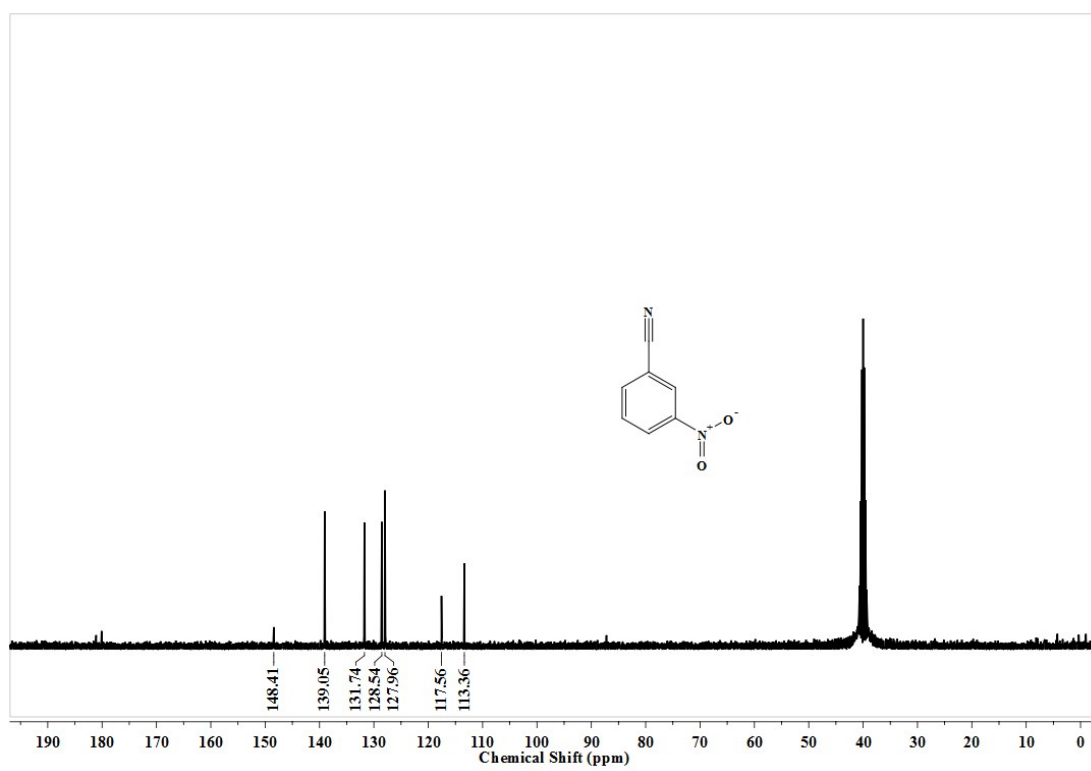

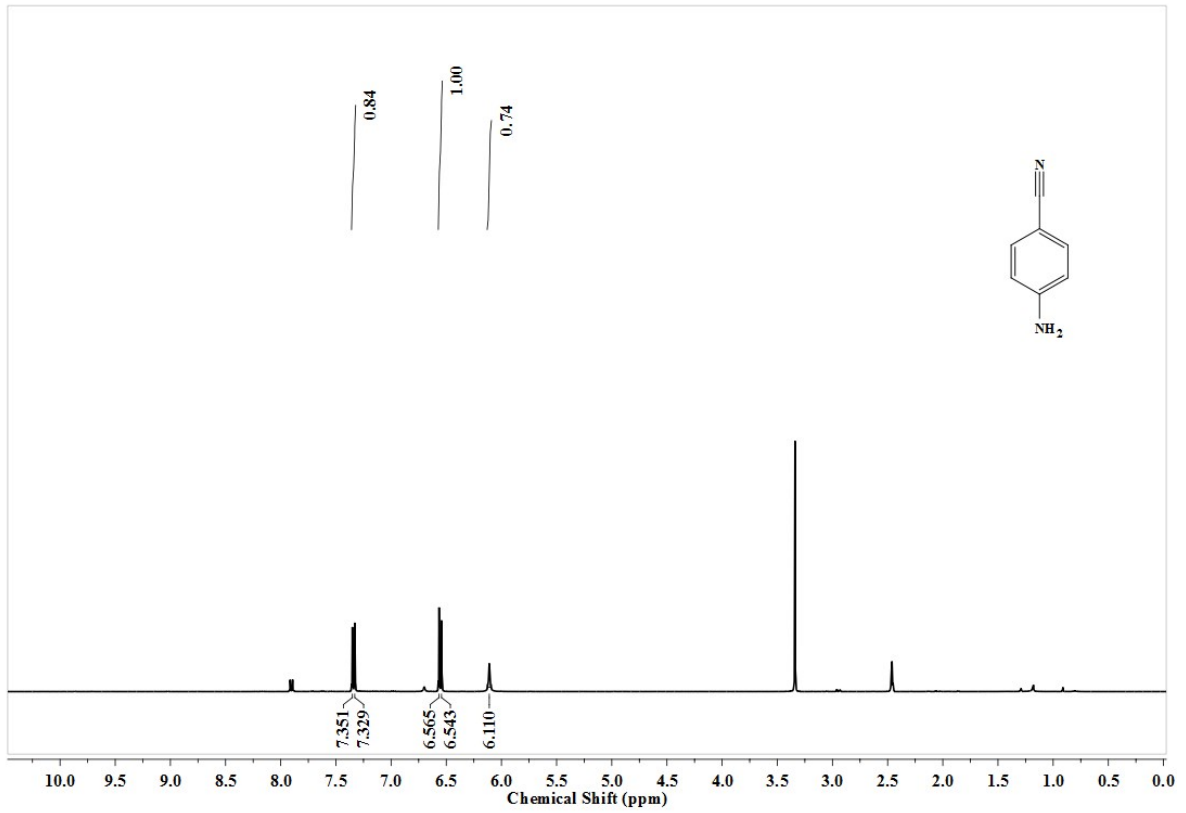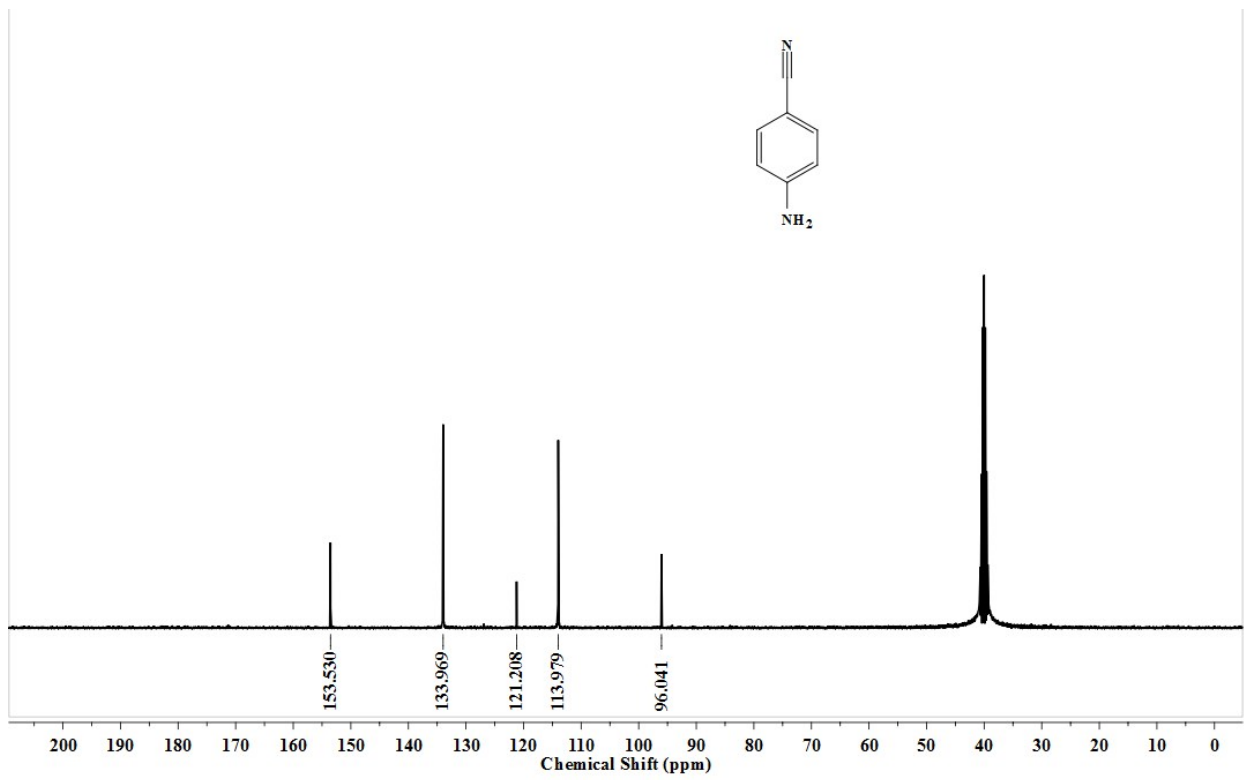

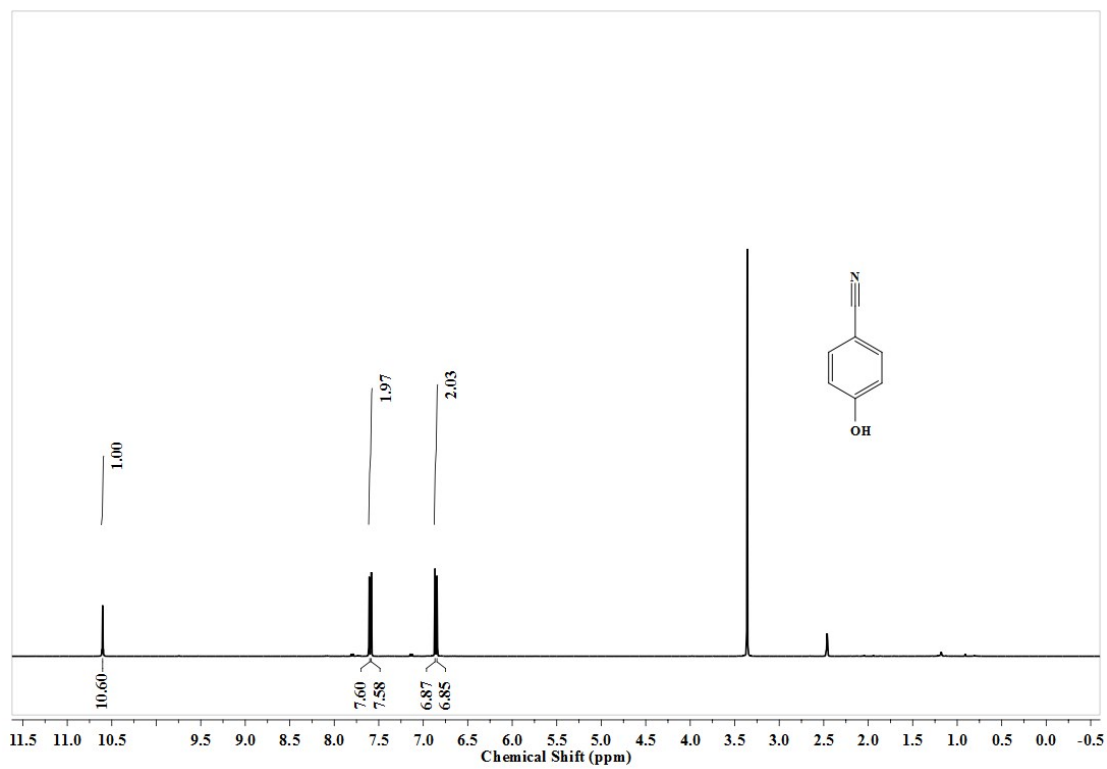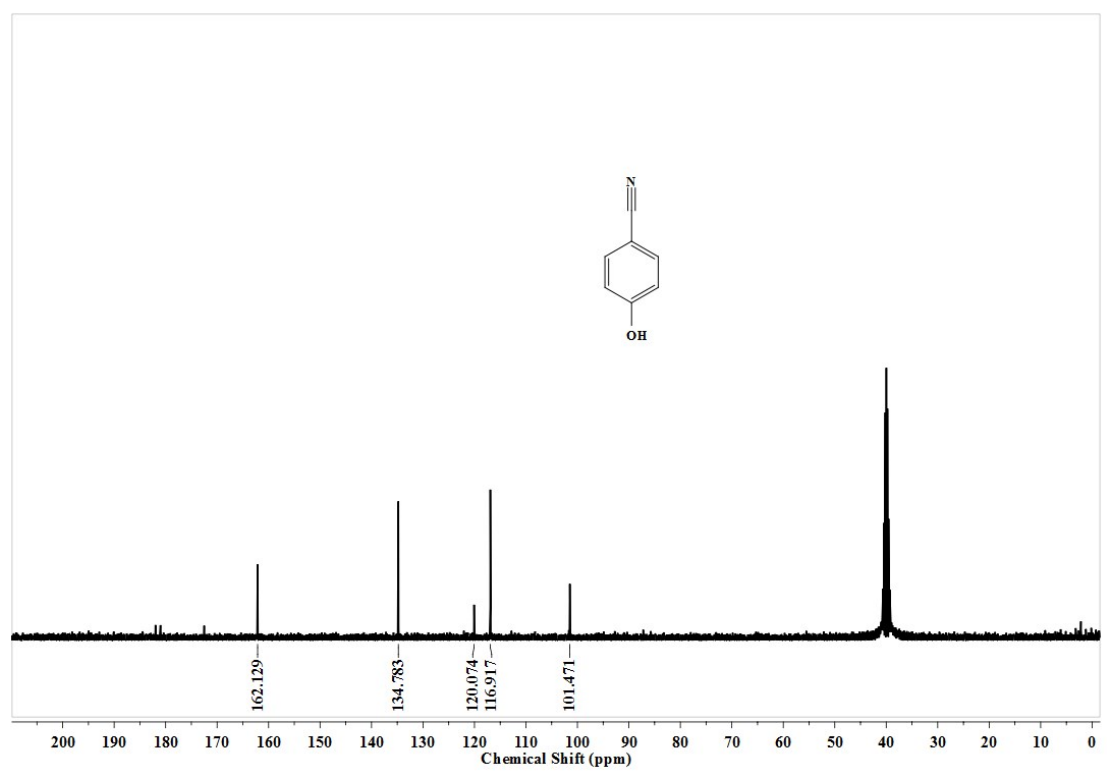



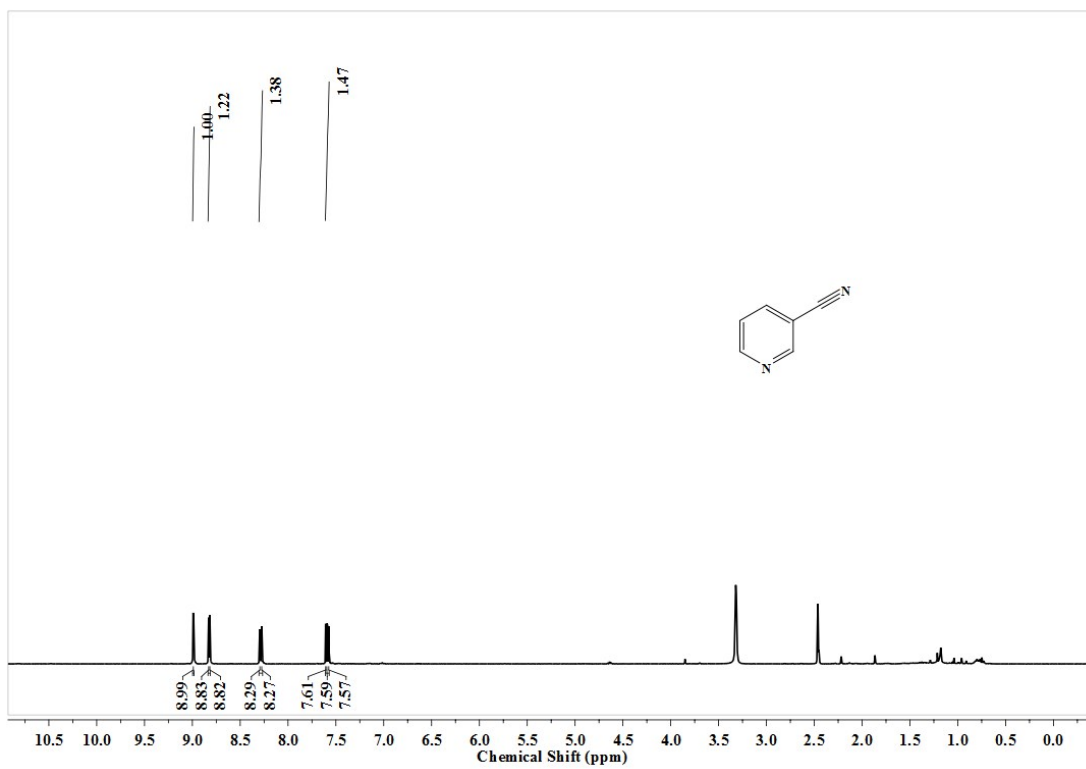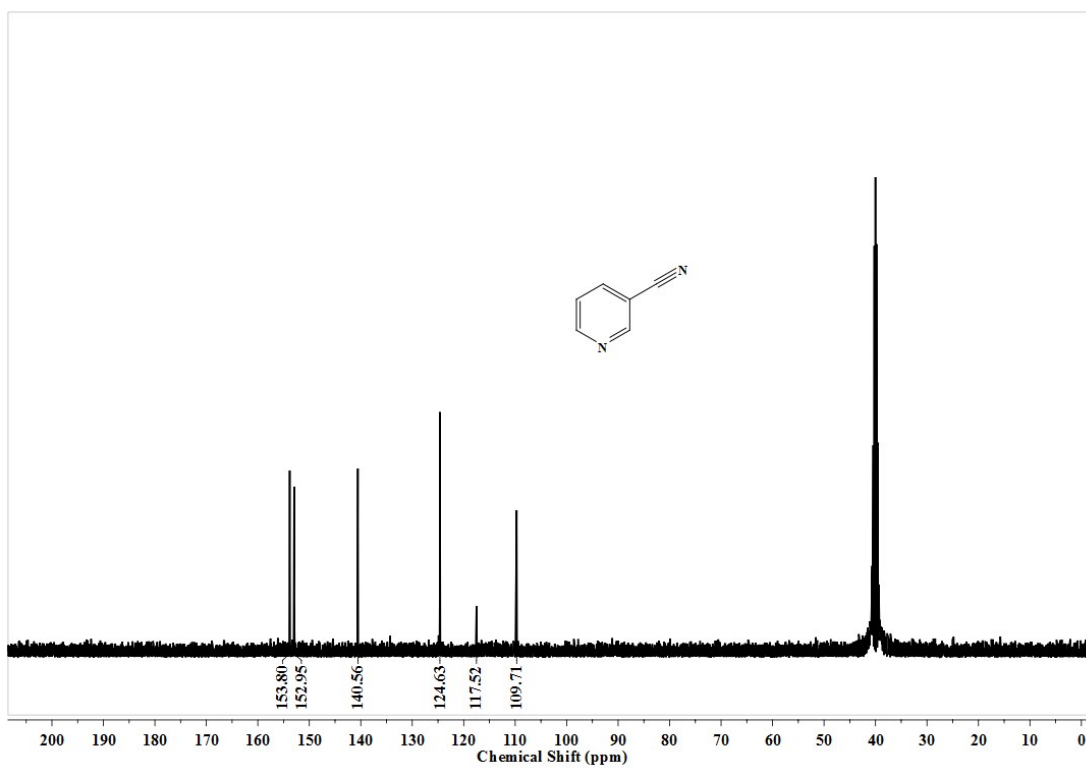

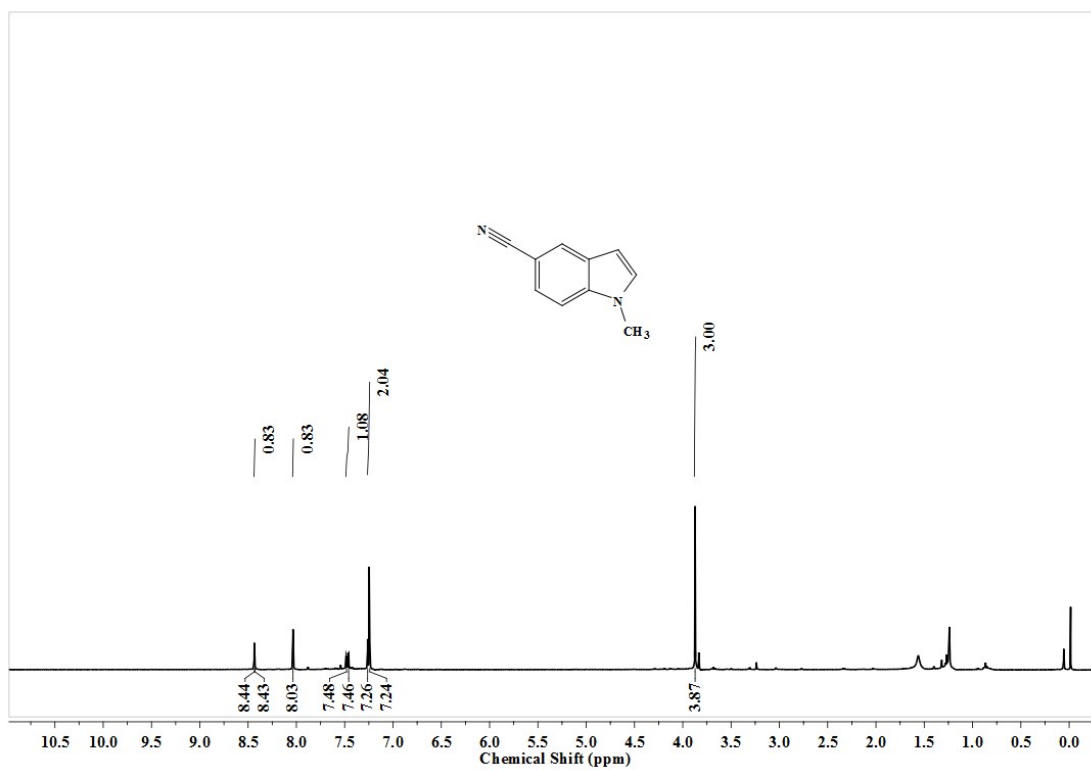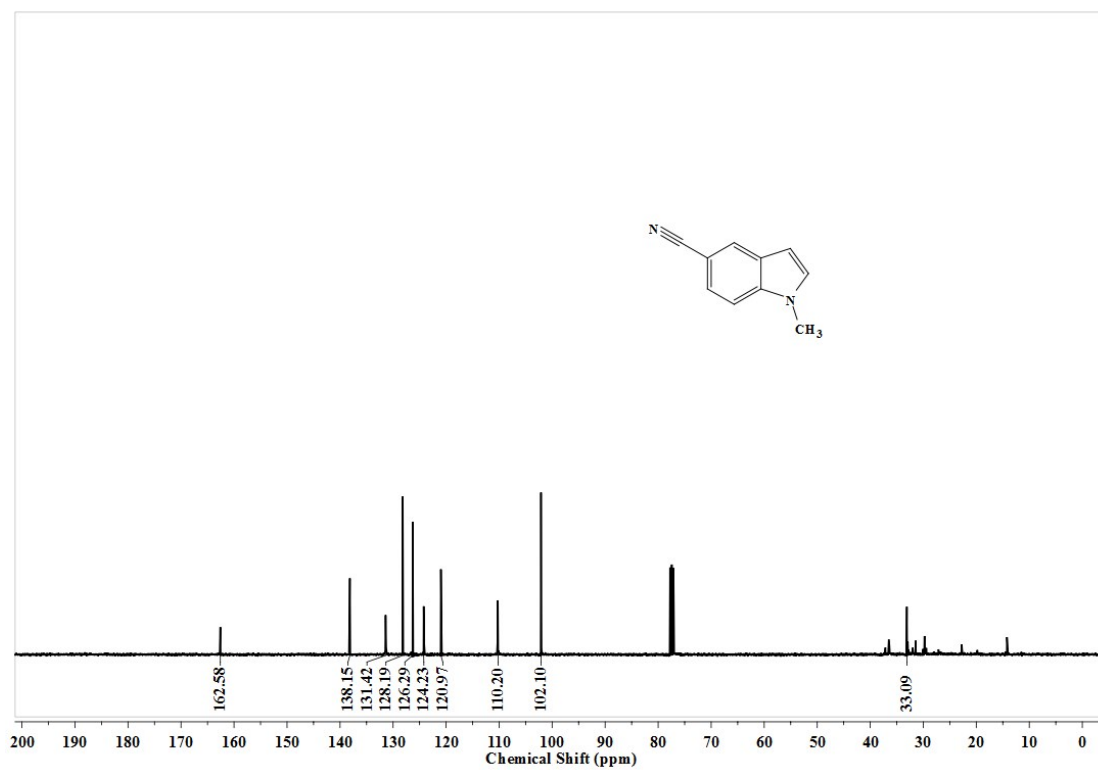

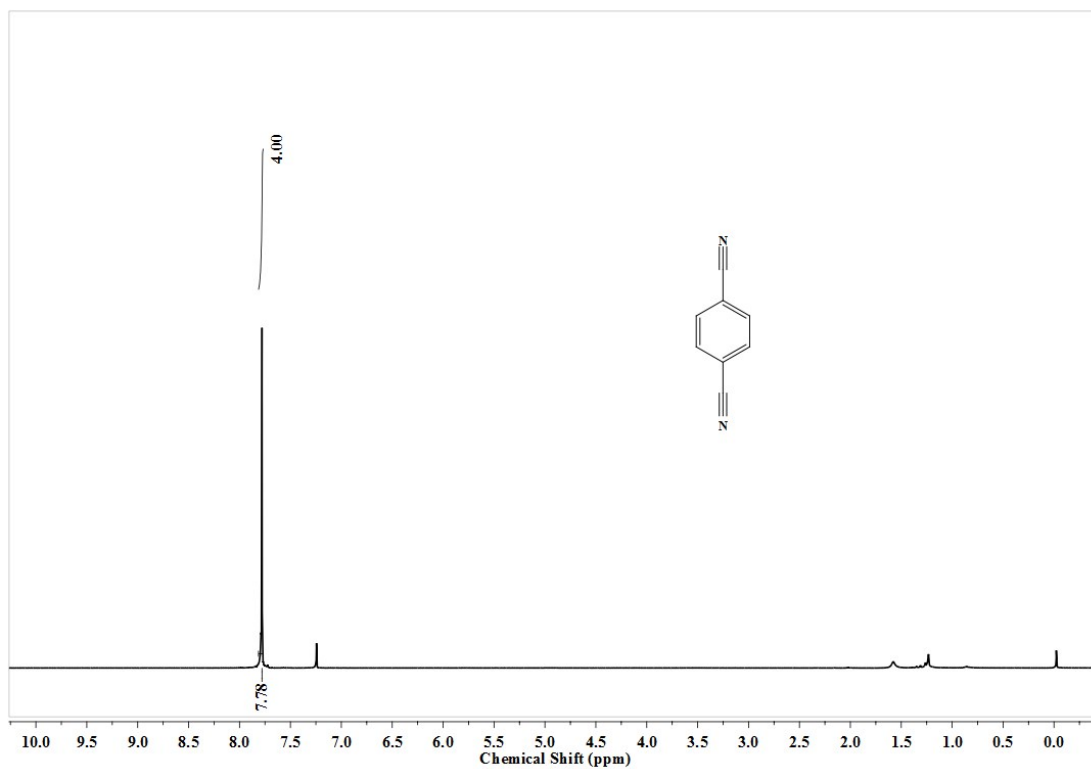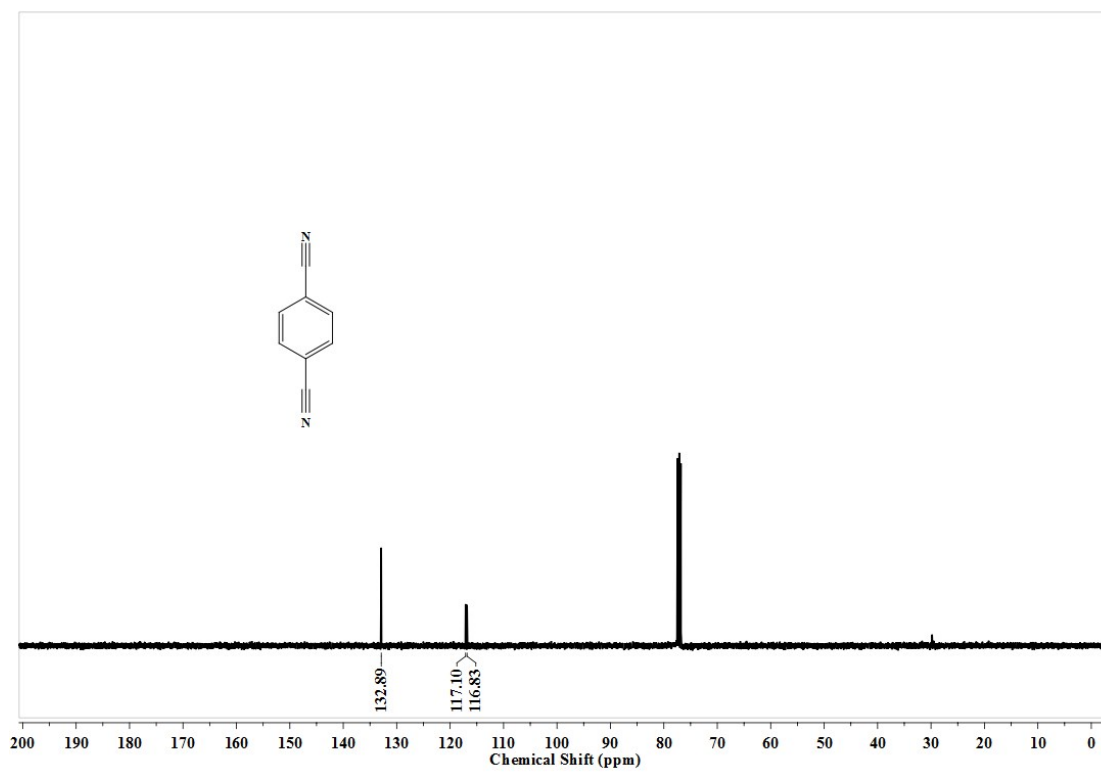

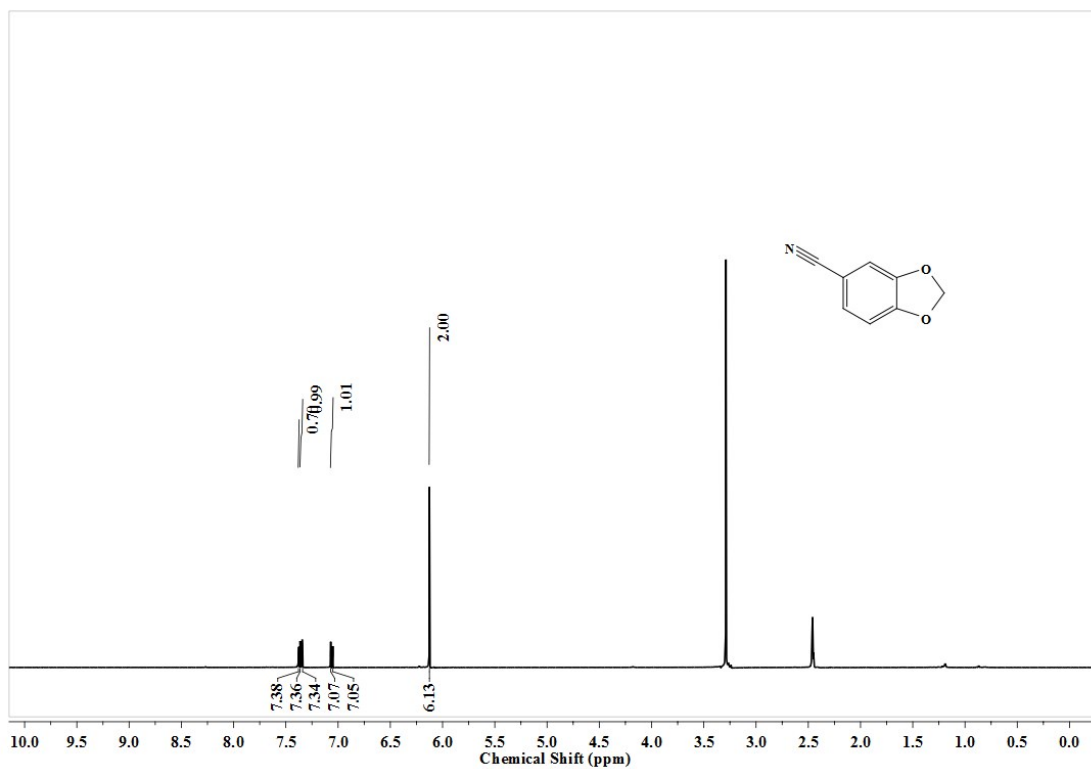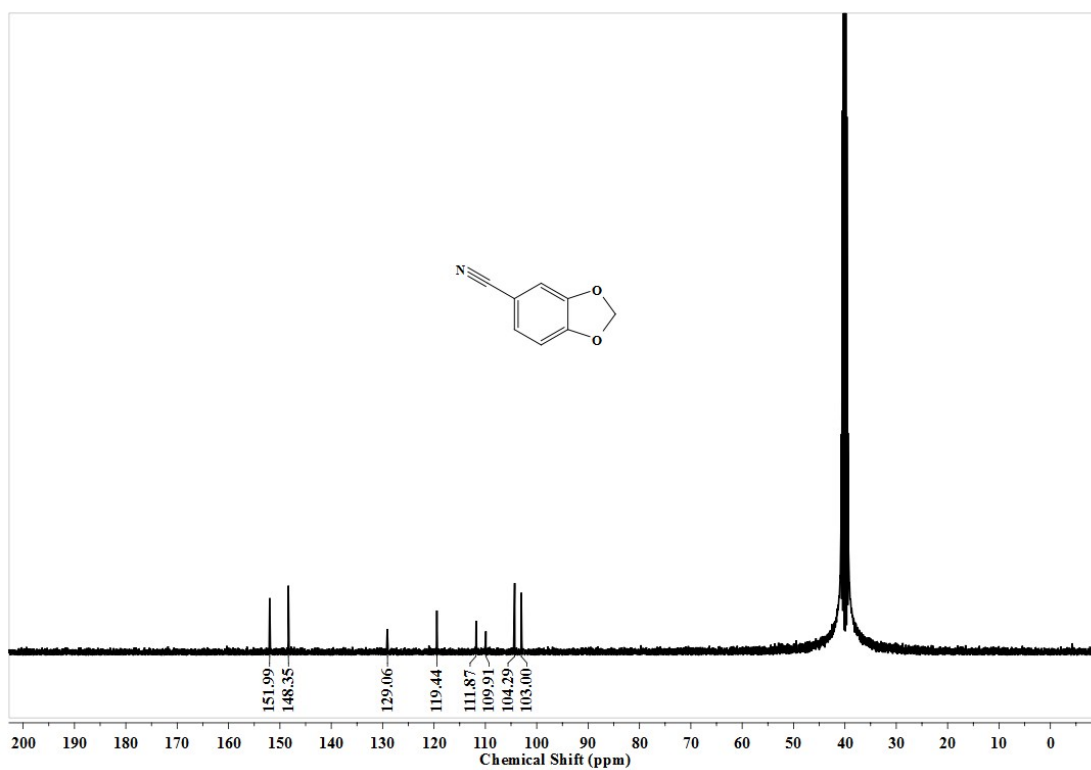

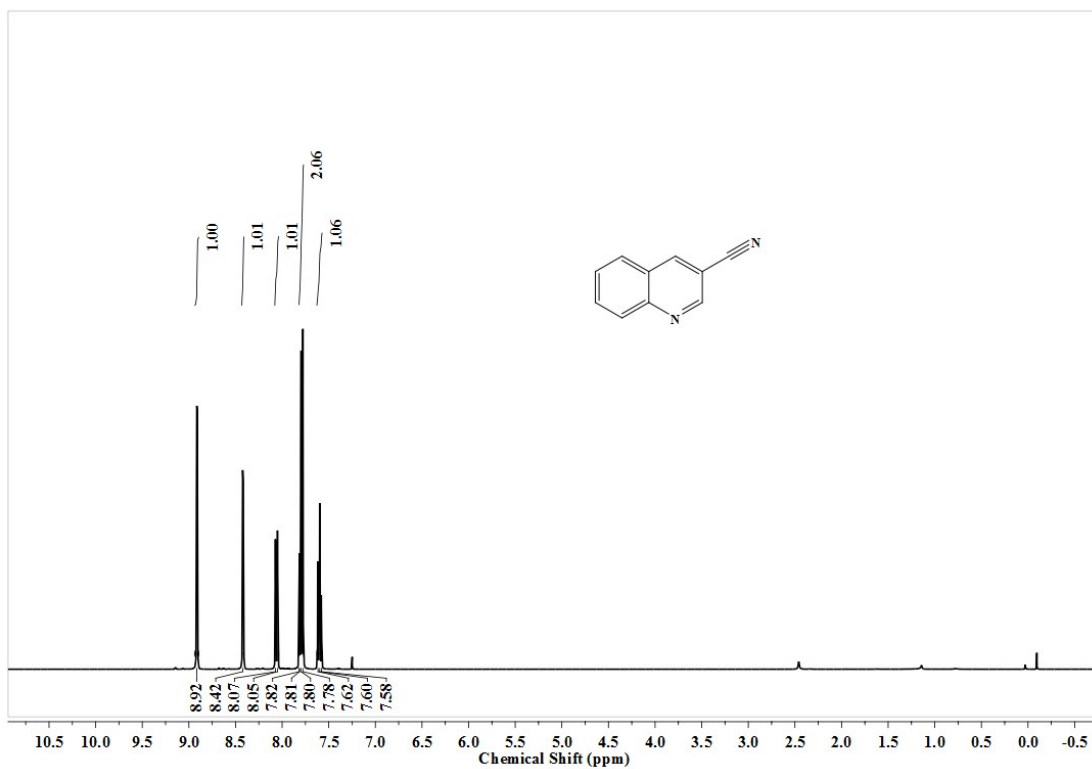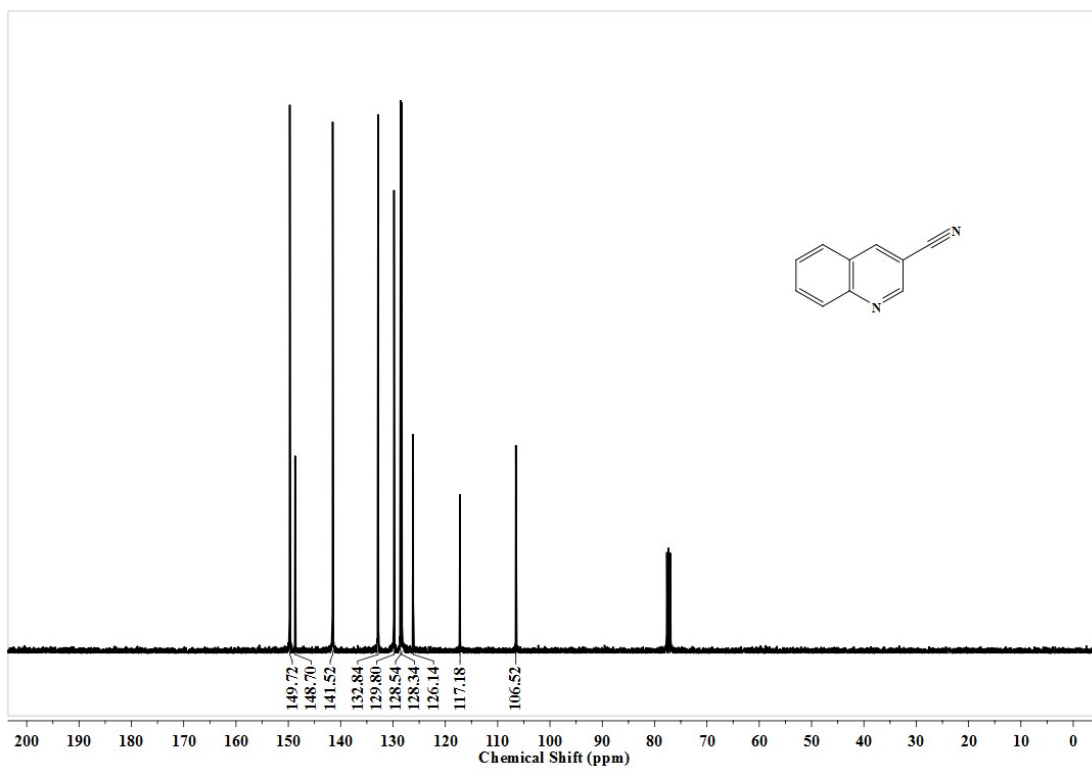

Supplement: d0ob02518f1.pdf [file d0ob02518f1.pdf]
